# Supplementary material
Source: HighWire-hosted journal article supplement (https://bmjopen.bmj.com/content/12/4/e057953)
Supplement: inline-supplementary-material-1 [file inline-supplementary-material-1.pdf]

## TECHNICAL APPENDIX

### **Projected impact of change in the percentage of energy from each NOVA group intake on cardiovascular disease mortality in Brazil: A modelling study**

Patrícia Vasconcelos Leitão Moreira<sup>1\*</sup>, Adélia da Costa Pereira de Arruda Neta<sup>1</sup>, Flávia Emília Leite Lima Ferreira<sup>1</sup>, Jevuks Matheus de Araújo<sup>2</sup>, Maria Laura da Costa Louzada<sup>3</sup>, Rafaela Lira Formiga Cavalcanti de Lima<sup>1</sup>, Rodrigo Pinheiro de Toledo Vianna<sup>1</sup>, José Moreira da Silva Neto<sup>4</sup>, Zoe Colombet<sup>5</sup>, Martin O'Flaherty<sup>5</sup>

<sup>1</sup> Department of Nutrition, Federal University of Paraíba, João Pessoa, Paraíba, Brazil.

<sup>2</sup> Department of Economy, Federal University of Paraíba, João Pessoa, Paraíba, Brazil.

<sup>3</sup> Centre for Epidemiological Studies in Health and Nutrition, Public Health Faculty, University of São Paulo, São Paulo, Brazil

<sup>4</sup> Technical School of Health of the Federal University of Paraíba

<sup>5</sup> Department of Public Health and Policy, University of Liverpool, Liverpool, United Kingdom

**List of abbreviations**

|        |                                                                                                             |
|--------|-------------------------------------------------------------------------------------------------------------|
| BR     | Brazil                                                                                                      |
| CHD    | Cardiovascular heart disease                                                                                |
| CMC    | Cumulative mortality change                                                                                 |
| CVD    | Cardiovascular disease                                                                                      |
| G1     | Group 1 (Unprocessed or minimally processed food)                                                           |
| G2     | Group 2 (Processed culinary ingredients)                                                                    |
| G3     | Group 3 (Processed food)                                                                                    |
| G4     | Group 4 (Ultra-processed food)                                                                              |
| g      | Grams                                                                                                       |
| HBS    | Household Budget Survey                                                                                     |
| IBGE   | <i>Instituto Brasileiro de Geografia e Estatística</i><br>(Brazilian Institute of Geography and Statistics) |
| Kcal   | Kilo Calorie                                                                                                |
| kJ     | Kilo Joules                                                                                                 |
| nCMC   | Non-cumulative mortality change                                                                             |
| Na     | Sodium                                                                                                      |
| POF    | <i>Pesquisa de Orçamento Familiar</i> (Household Budget Survey)                                             |
| PUFA   | Polyunsaturated fatty acids                                                                                 |
| SATFAT | Saturated Fat                                                                                               |
| UK     | United Kingdom                                                                                              |
| UPF    | Ultra-processed food                                                                                        |
| WHO    | World Health Organization                                                                                   |

## Table of Contents

|                                                                                                                            |    |
|----------------------------------------------------------------------------------------------------------------------------|----|
| Section 1. Methods.....                                                                                                    | 4  |
| 1a Quantifying the average nutrient profile by nova classification in the Brazilian diet .....                             | 4  |
| 1a.1 UPF typology description .....                                                                                        | 4  |
| 1a.2 Data sources and processing .....                                                                                     | 4  |
| 1b Estimating the impact of reducing consumption of these foods upon mortality from coronary heart disease and stroke..... | 5  |
| 1b.1 Simulating the impact of reducing saturated fat, trans-fat, salt and added sugar in the food groups.....              | 5  |
| 1b.2 Calculating the Cumulative Mortality Change (CMC) and the Non-cumulative Mortality Change (nCMC) .....                | 12 |
| 1b.3 Estimating the reduction in deaths with cumulative and non-cumulative effects .....                                   | 32 |
| 1c Describing the probabilistic sensitive analysis (PSA).....                                                              | 36 |
| 2 RESULTS .....                                                                                                            | 37 |
| 2.a Nutrient level in different food groups.....                                                                           | 37 |
| 2b Expected mortality reduction.....                                                                                       | 42 |
| APPENDIX.....                                                                                                              | 47 |
| Table A. Population and data sources used in the UPF IMPACT model.....                                                     | 47 |
| Table B. Data sources for Nutrient profile indicators of the food groups .....                                             | 47 |
| Table C. Data sources for effects estimates .....                                                                          | 48 |
| References.....                                                                                                            | 49 |

## Section 1. Methods

In this section it will be described the steps to building the modelling. Initially, it is necessary to estimate average nutrient profile and then assess the mortality reduction associated to changes in the average nutrient profile. The data related to the personal food consumption were collected for all residents aged 10 or over from 20,112 selected households, which corresponded to a subsample of 34.7% of the 57,920 households that were investigated in the Brazilian Household Budget Survey (HBS, 2017-2018). In this way, information was obtained on the individual food consumption of 34,003 residents (BRAZIL, 2020).

Then, it will be simulated reductions in the consumption of salt, saturated fat, trans fat and added sugar and its impacts in reduction CVD deaths.

### 1a Quantifying the average nutrient profile by NOVA classification in the Brazilian diet

#### *1a.1 UPP typology description*

A new food classification based on the nature, extent and purpose of food processing has been devised by Monteiro et al. (2016) at the School of Public Health at the University of São Paulo in Brazil. The NOVA classification categorizes foodstuffs into four groups (1,2) and it divides foods according to the extent and the purpose of industrial processing to which they were subjected (3)(2). It is the basis of the Guide food for the Brazilian population (4). Ultra-processed foods are defined as formulations of ingredients, mostly for exclusive industrial use, which go through a series of industrial processes, generally resulting in products that are nutritionally poor and rich in calories, sugar, fat, salt and chemical additives, with flavour enhanced and longer shelf life.

#### *1a.2 Data sources and processing*

The Brazilian Institute of Geography and Statistics (IBGE) in 2002/2003, 2008/2009, 2017/2018 conducted a national household budget survey and the total numbers of households was 48,470 in 2002-2003, 55,970 in 2008-2009 and 57,920 in 2017-2018 (5)(6) (7). In this study, we analyzed the food consumption data which was obtained through two recall surveys of 24 hours, on non-consecutive days, chosen throughout the week. . All items were classified

into the typology from Group 1 ('Unprocessed or minimally processed foods'), Group 2 ('Processed culinary ingredients'), Group 3 ('Processed foods') or Group 4 ('Ultra-processed foods and drink products'), according to NOVA classification (3)(2).

### **1b Estimating the impact of reducing consumption of these foods upon mortality from coronary heart disease and stroke**

The next step to take is to quantify the effect of dietary change on average daily nutritional intake in each of the scenarios run in the model. We can then estimate the subsequent effects on CVD. This is achieved using information from existing studies which quantify such effects.

#### *1b.1 Simulating the impact of reducing saturated fat, trans-fat, salt and added sugar in the food groups*

Figure 1 illustrates relationships between inputs and outputs within the model.

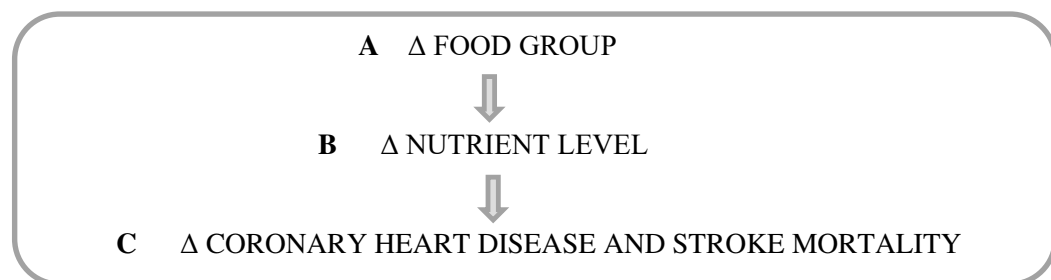

Fig 1. Links in the model

Five scenarios were constructed using consumption values in relation to the food groups already registered in previous research (7)(8). Our baseline scenario was constructed based on food consumption data for the Brazilian population, according to the HBS 2017-2018. However, the proposed scenarios were built based on the percentages of previous HBSs, both in food consumption and in household food purchases, as there is no data available for the food consumption of all previous HBS, based on the NOVA classification. The intention was to propose plausible scenarios of a reality for the Brazilian population in a not-so-distant past. See the Box 1 below.

In the **Optimistic Scenario**: we assume to increase the average energy consumption of G1 ('unprocessed or minimally processed foods') to the level of HBS 2008-2009, that is, to increase to 69.5% (9). In addition, we also assume to reduce, at the level of purchases in HBS 2002-2003, the average energy consumption of G3 ('processed foods') and G4 ('ultra-processed foods'), that is, reducing to 8% and 12.6%, respectively. And reduce to 10% in G2 ('processed culinary ingredients').

In the **Minimal Scenario**: we assume to reduce the average percentage of energy consumption in G4 ('ultra-processed foods') found in HBS in 2017-2018 (19.7%) to the average percentage of purchases in HBS in 2008-2009 (16%). We added this difference in energy percentage between HBS (3.7%) to G1 ('unprocessed or minimally processed foods'). In this scenario, the average percentage of energy consumption of G2 ('processed culinary ingredients') and G3 ('processed food'), according to HBS 2017-2018, were maintained.

**Box 1:** Relative participation of food groups and subgroups in total calories determined by household food purchase - Brazil - 2002/2018.

| NOVA CLASSIFICATION                                       | HBS 2002-2003 (5) | HBS 2008-2009 (8) | HBS 2017-2018 (10) |
|-----------------------------------------------------------|-------------------|-------------------|--------------------|
| <b>G1</b><br>(‘unprocessed or minimally processed foods’) | 53.3%             | 50.4%             | 49.5%              |
| <b>G2</b><br>(‘processed culinary ingredients’)           | 25.8%             | 24.2%             | 22.3%              |
| <b>G3</b><br>(‘processed foods’)                          | 8.3%              | 9.4%              | 9.8%               |
| <b>G4</b><br>(‘ultra-processed foods’)                    | 12.6%             | 16.0%             | 18.4%              |

In the **Modest Scenario**: we assume to reduce by 25% the average percentage of energy consumption, found in HBS 2017-2018, of G2 ('processed culinary ingredients') and G3 ('processed food'). In this scenario, the average percentage of energy consumption of G1 ('unprocessed or minimally processed foods') and G4 ('ultra-processed foods'), according to HBS 2017-2018, were maintained.

In the **Intermediary Scenario**: we assume to reduce the average percentage of energy consumption in G4 ('ultra-processed foods') found in HBS in 2017-2018 (19.7%) to the average percentage of purchases in HBS in 2008-2009 (16%). We added this difference in energy percentage between HBS (3.7%) to G1 ('unprocessed or minimally processed foods'). In

addition, reduce by 25% the average percentage of energy consumption, found in HBS 2017-2018, of G2 ("processed culinary ingredients").

In the **Advanced Scenario**: we assume to reduce the average percentage of energy consumption in G4 ('ultra-processed foods') found in HBS in 2017-2018 (19.7%) to the average percentage of purchases in HBS in 2008-2009 (16%). We added this difference in energy percentage between HBS (3.7%) to G1 ('unprocessed or minimally processed foods'). In addition, reduce by 25% the average percentage of energy consumption, found in HBS 2017-2018, of G2 ("processed culinary ingredients") and G3 ('processed food').

We estimated the change in nutrient composition by subtracting the nutrient levels at the baseline to the healthier option.

#### *Saturated Fat (SAT FAT)*

In **Box 2** we have the distribution of saturated fat consumption by sex and age in Brazilian population.

**Box 2:** Distribution of saturated fat consumption by age and sex. Food consumption data – Brazil 2017/2018.

| Ages          | SAT FAT in grams |             | SAT FAT in Kcal |               |
|---------------|------------------|-------------|-----------------|---------------|
|               | Mean             | Min-max     | Mean            | Min-max       |
| <b>Male</b>   |                  |             |                 |               |
| <b>25-34</b>  | 21.48            | 2.06-98.44  | 193.40          | 18.57-886.02  |
| <b>35-44</b>  | 20.83            | 3.44-90.09  | 187.55          | 30.97-810.82  |
| <b>45-54</b>  | 20.10            | 3.11-81.19  | 180.91          | 28.05-730.76  |
| <b>55-64</b>  | 18.82            | 3.36-63.50  | 169.41          | 30.31-571.50  |
| <b>65-74</b>  | 18.04            | 3.61-76.34  | 162.43          | 32.51-687.08  |
| <b>75-84</b>  | 17.35            | 3.30-46.04  | 156.18          | 29.75-414.40  |
| <b>85+</b>    | 16.37            | 4.82-56.74  | 147.35          | 43.44-510.66  |
| <b>Female</b> |                  |             |                 |               |
| <b>25-34</b>  | 17.69            | 2.72-142.84 | 159.25          | 24.50-1285.63 |
| <b>35-44</b>  | 16.69            | 3.21-72.44  | 150.25          | 28.93-652.03  |
| <b>45-54</b>  | 16.23            | 3.54-56.73  | 146.08          | 31.92-510.60  |
| <b>55-64</b>  | 15.43            | 3.94-67.79  | 138.89          | 35.49-610.18  |
| <b>65-74</b>  | 14.99            | 2.96-48.04  | 134.98          | 26.68-432.40  |
| <b>75-84</b>  | 14.69            | 4.57-39.58  | 132.24          | 41.17-356.30  |
| <b>85+</b>    | 14.34            | 3.34-41.89  | 129.10          | 30.06-377.04  |

Beta values for CHD and Stroke (See Box 3) were taken from a meta-analysis by Jakobsen *et al.* (2009)(11). These authors proposed replacing 5% of total energy intake coming from saturated fats with energy from polyunsaturated fats and estimated the resulting reduction in cardiovascular mortality.

**Box 3:** Beta values for CHD and Stroke in relation to age and sex for saturated fat.

| Ages     | CHD Men               | STROKE Men            | CHD Women             | STROKE Women          |
|----------|-----------------------|-----------------------|-----------------------|-----------------------|
| 25 to 34 | $\beta = 0.073894737$ | $\beta = 0.081710526$ | $\beta = 0.073894737$ | $\beta = 0.081710526$ |
| 35 to 44 | $\beta = 0.073894737$ | $\beta = 0.081710526$ | $\beta = 0.073894737$ | $\beta = 0.081710526$ |
| 45 to 54 | $\beta = 0.052$       | $\beta = 0.0575$      | $\beta = 0.052$       | $\beta = 0.0575$      |
| 55 - 64  | $\beta = 0.036947368$ | $\beta = 0.040855263$ | $\beta = 0.036947368$ | $\beta = 0.040855263$ |
| 65 - 74  | $\beta = 0.027341053$ | $\beta = 0.030232895$ | $\beta = 0.027341053$ | $\beta = 0.030232895$ |
| 75-84    | $\beta = 0.026027368$ | $\beta = 0.028780263$ | $\beta = 0.026027368$ | $\beta = 0.028780263$ |
| 85+      | $\beta = 0.026027368$ | $\beta = 0.028780263$ | $\beta = 0.026027368$ | $\beta = 0.028780263$ |

\* Source: Jakobsen *et al.* (2009)(11)

### Salt

Salt is preferred to sodium as an input for this model, meaning that we needed to convert our figures from sodium content to salt content. Quantity of salt was calculated using the following assumption: **1g Salt = 0.4 g sodium** (12).

**Box 4:** Distribution of salt consumption by age and sex. Food consumption data – Brazil 2017/2018.

| Ages   | SALT in grams |            |
|--------|---------------|------------|
|        | Mean          | Min-max    |
| Male   |               |            |
| 25-34  | 7.66          | 1.35-34.31 |
| 35-44  | 7.42          | 1.51-26.23 |
| 45-54  | 7.11          | 1.60-26.37 |
| 55-64  | 6.75          | 1.53-24.82 |
| 65-74  | 6.33          | 1.13-20.56 |
| 75-84  | 6.03          | 1.55-20.02 |
| 85+    | 5.60          | 1.68-16.64 |
| Female |               |            |



|              |      |            |
|--------------|------|------------|
| <b>25-34</b> | 5.92 | 1.25-23.93 |
| <b>35-44</b> | 5.62 | 1.25-22.41 |
| <b>45-54</b> | 5.42 | 1.05-23.92 |
| <b>55-64</b> | 5.18 | 1.19-21.73 |
| <b>65-74</b> | 5.06 | 0.90-21.34 |
| <b>75-84</b> | 4.90 | 1.33-15.03 |
| <b>85+</b>   | 4.74 | 1.70-14.03 |

Beta values for the effect of salt on CHD and stroke (See Box 5) were taken from a meta-analysis by Strazzullo *et al.* (2009)(13). Here the authors demonstrate that reducing salt intake by 5 g/day (equivalent to 2000 mg sodium less per day) translates into approximately 17% fewer CVD deaths each year.

In **Box 6** we have the distribution of saturated fat consumption by sex and age in Brazilian population.

**Box 5:** Beta values for CHD and Stroke in relation to age and sex for salt.

| <b>Ages</b>     | <b>CHD Men</b>        | <b>STROKE Men</b>     | <b>CHD Women</b>      | <b>STROKE Women</b>   |
|-----------------|-----------------------|-----------------------|-----------------------|-----------------------|
| <b>25 to 34</b> | $\beta = 0.048315789$ | $\beta = 0.065368421$ | $\beta = 0.048315789$ | $\beta = 0.065368421$ |
| <b>35 to 44</b> | $\beta = 0.048315789$ | $\beta = 0.065368421$ | $\beta = 0.048315789$ | $\beta = 0.065368421$ |
| <b>45 to 54</b> | $\beta = 0.034$       | $\beta = 0.046$       | $\beta = 0.034$       | $\beta = 0.046$       |
| <b>55 - 64</b>  | $\beta = 0.024157895$ | $\beta = 0.032684211$ | $\beta = 0.024157895$ | $\beta = 0.032684211$ |
| <b>65 - 74</b>  | $\beta = 0.017876842$ | $\beta = 0.024186316$ | $\beta = 0.017876842$ | $\beta = 0.024186316$ |
| <b>75-84</b>    | $\beta = 0.017017895$ | $\beta = 0.023024211$ | $\beta = 0.017017895$ | $\beta = 0.023024211$ |
| <b>85+</b>      | $\beta = 0.017017895$ | $\beta = 0.023024211$ | $\beta = 0.017017895$ | $\beta = 0.023024211$ |

\* Source: Strazzullo *et al.* (2009) (13)

### Trans Fat

**Box 6:** Distribution of trans fat consumption by age and sex. Food consumption data – Brazil 2017/2018.

| <b>Ages</b>  | <b>Trans FAT in grams</b> |                | <b>Trans FAT in Kcal</b> |                |
|--------------|---------------------------|----------------|--------------------------|----------------|
|              | <b>Mean</b>               | <b>Min-max</b> | <b>Mean</b>              | <b>Min-max</b> |
| <b>25-34</b> | 1.49                      | 0.01-12.06     | 13.44                    | 0.14-108.55    |

|               |      |            |       |             |
|---------------|------|------------|-------|-------------|
| <b>35-44</b>  | 1.38 | 0.01-11.89 | 12.50 | 0.15-107.06 |
| <b>45-54</b>  | 1.31 | 0.04-12.40 | 11.81 | 0.42-111.68 |
| <b>55-64</b>  | 1.18 | 0.09-7.75  | 10.62 | 0.82-69.75  |
| <b>65-74</b>  | 1.12 | 0.02-5.65  | 10.10 | 0.26-50.89  |
| <b>75-84</b>  | 1.05 | 0.24-4.26  | 9.53  | 2.17-38.36  |
| <b>85+</b>    | 1.01 | 0.06-4.78  | 9.17  | 0.59-43.09  |
| <b>Female</b> |      |            |       |             |
| <b>25-34</b>  | 1.27 | 0.00-11.48 | 11.46 | 0.08-103.33 |
| <b>35-44</b>  | 1.16 | 0.03-7.00  | 10.46 | 0.27-63.03  |
| <b>45-54</b>  | 1.09 | 0.04-5.61  | 9.81  | 0.41-50.51  |
| <b>55-64</b>  | 1.01 | 0.00-5.30  | 9.12  | 0.04-47.74  |
| <b>65-74</b>  | 0.96 | 0.00-11.43 | 8.71  | 0.00-102.93 |
| <b>75-84</b>  | 0.93 | 0.02-3.57  | 8.37  | 0.19-32.14  |
| <b>85+</b>    | 0.84 | 0.00-3.16  | 7.57  | 0.00-28.44  |

A reduction in the consumption of 1.0% of the total energy from trans-fat, according to meta-analysis proposed by Mozaffarian & Clark (2009)(14), in which was demonstrated a 12% decrease in CVD deaths for every 1% absolute reduction of trans-fat consumption (Mozaffarian meta-analysis). From this meta-analysis was extracted the beta values for CHD and Stroke (See Box 7).

**Box 7:** Beta values for CHD and Stroke in relation to age and sex for trans fat

| <b>Ages</b>     | <b>CHD Men</b>        | <b>STROKE Men</b>     | <b>CHD Women</b>      | <b>STROKE Women</b>   |
|-----------------|-----------------------|-----------------------|-----------------------|-----------------------|
| <b>25 to 34</b> | $\beta = 0.163421053$ | $\beta = 0.081710526$ | $\beta = 0.163421053$ | $\beta = 0.081710526$ |
| <b>35 to 44</b> | $\beta = 0.163421053$ | $\beta = 0.081710526$ | $\beta = 0.163421053$ | $\beta = 0.081710526$ |
| <b>45 to 54</b> | $\beta = 0.115$       | $\beta = 0.0575$      | $\beta = 0.115$       | $\beta = 0.0575$      |
| <b>55 - 64</b>  | $\beta = 0.081710526$ | $\beta = 0.040855263$ | $\beta = 0.081710526$ | $\beta = 0.040855263$ |
| <b>65 - 74</b>  | $\beta = 0.060465789$ | $\beta = 0.030232895$ | $\beta = 0.060465789$ | $\beta = 0.030232895$ |
| <b>75-84</b>    | $\beta = 0.057560526$ | $\beta = 0.028780263$ | $\beta = 0.057560526$ | $\beta = 0.028780263$ |
| <b>85+</b>      | $\beta = 0.057560526$ | $\beta = 0.028780263$ | $\beta = 0.057560526$ | $\beta = 0.028780263$ |

\* Source: Mozaffarian & Clark (2009)(14)

Added Sugar

In **Box 8** we have the distribution of added sugar consumption by sex and age in Brazilian population.

**Box 8:** Distribution of added sugar consumption by age and sex. Food consumption data – Brazil 2017/2018.

| Ages          | Added sugar in grams |             | Added sugar in Kcal |              |
|---------------|----------------------|-------------|---------------------|--------------|
|               | Mean                 | Min-max     | Mean                | Min-max      |
| <b>Male</b>   |                      |             |                     |              |
| <b>25-34</b>  | 28.48                | 0.54-218.12 | 113.92              | 2.18-872.48  |
| <b>35-44</b>  | 26.56                | 0.05-206.04 | 106.26              | 0.22-824.16  |
| <b>45-54</b>  | 24.94                | 0.08-255.42 | 99.76               | 0.33-1021.68 |
| <b>55-64</b>  | 24.07                | 0.00-221.73 | 96.28               | 0.00-886.92  |
| <b>65-74</b>  | 23.87                | 0.00-205.05 | 95.51               | 0.00-820.20  |
| <b>75-84</b>  | 27.13                | 0.00-264.94 | 108.53              | 0.00-1059.76 |
| <b>85+</b>    | 28.25                | 0.18-127.49 | 113.00              | 0.74-509.97  |
| <b>Female</b> |                      |             |                     |              |
| <b>25-34</b>  | 27.78                | 0.19-375.53 | 111.15              | 0.76-1502.12 |
| <b>35-44</b>  | 25.42                | 0.14-214.57 | 101.71              | 0.56-858.31  |
| <b>45-54</b>  | 24.77                | 0.00-212.39 | 99.10               | 0.00-849.57  |
| <b>55-64</b>  | 23.38                | 0.00-298.61 | 93.52               | 0.00-1194.45 |
| <b>65-74</b>  | 23.63                | 0.00-146.26 | 94.54               | 0.00-585.04  |
| <b>75-84</b>  | 25.44                | 0.00-182.91 | 101.77              | 0.00-731.67  |
| <b>85+</b>    | 32.36                | 0.00-187.67 | 129.45              | 0.00-750.68  |

Beta values for CHD and stroke (See Box 9) were taken from a meta-analysis by Yang et al. (2014)(15). These authors proposed a reduction in 38% risk of CVD by consuming 8% per day of added sugar (15).

**Box 9: Beta values for CVD in relation to age and sex for added sugar**

| Ages            | CVD Men           | CVD Women         |
|-----------------|-------------------|-------------------|
| <b>25 to 34</b> | $\beta = 0.0104$  | $\beta = 0.0104$  |
| <b>35 to 44</b> | $\beta = 0.0104$  | $\beta = 0.0104$  |
| <b>45 to 54</b> | $\beta = 0.013$   | $\beta = 0.013$   |
| <b>55 - 64</b>  | $\beta = 0.0156$  | $\beta = 0.0156$  |
| <b>65 - 74</b>  | $\beta = 0.01872$ | $\beta = 0.01872$ |
| <b>75-84</b>    | $\beta = 0.02246$ | $\beta = 0.02246$ |
| <b>85+</b>      | $\beta = 0.02246$ | $\beta = 0.02246$ |

\* Source: Yang et al. (2014)(15)

### *1b.2 Calculating the Cumulative Mortality Change (CMC) and the Non-cumulative Mortality Change (nCMC)*

After inputting all  $\beta$ -values into the models, we evaluated the cumulative mortality change (CMC) and the non-cumulative mortality change (nCMC) for CHD and Stroke. The generic equations and examples below show how CMC and nCMC were calculated in the scenarios. For simplicity we have always used the grouping of men under the age of 35 as our examples (Box 10 to Box 14).

### Box 10. FOOD POLICY OPTIMISTIC SCENARIO

|             | BASELINE |        |        |        |         | Optimistic Scenario: Increasing G1 to 2008-9 levels, reducing G2-G3-G4. |        |        |        |         |
|-------------|----------|--------|--------|--------|---------|-------------------------------------------------------------------------|--------|--------|--------|---------|
|             | GROUP1   | GROUP2 | GROUP3 | GROUP4 | Total   | GROUP1                                                                  | GROUP2 | GROUP3 | GROUP4 | Total   |
| Daily Share | 53.40%   | 15.60% | 11.30% | 19.70% | 100.00% | 69.50%                                                                  | 10.00% | 8.00%  | 12.00% | 100,00% |

#### Box 10.1: Cumulative Mortality Changes Equations (Optimistic Scenario) for CHD

| Cumulative mortality changes in the <b>Optimistic Scenario</b> :                                                                                                                                                                                                                                                                                                                                      | Example: CMC for CHD in men under 35 years in the <b>Optimistic Scenario</b>                                                                                                                                        |
|-------------------------------------------------------------------------------------------------------------------------------------------------------------------------------------------------------------------------------------------------------------------------------------------------------------------------------------------------------------------------------------------------------|---------------------------------------------------------------------------------------------------------------------------------------------------------------------------------------------------------------------|
| $CMC_{1(\text{Scenario } 1)} = 1 - \{[1 - (\beta_{\text{SatFat}} * \text{SatFatBaselineG1} - \text{SatFatScenario1G1})] * [1 - (\beta_{\text{Salt}} * \text{SaltBaselineG1} - \text{SaltScenario1G1})] * [1 - (\beta_{\text{TransFat}} * \text{TransFatBaselineG1} - \text{TransFatScenario1G1})] * [1 - (\beta_{\text{AddedSugar}} * \text{AddedSugarBaselineG1} - \text{AddedSugarScenario1G1})]\}$ | $CMC_1 = 1 - \{[1 - (0.072947368 * -2.587365)] * [1 - (0.048315789 * -0.310867)] * [1 - (0.165789474 * -0.078488)] * [1 - (0.010453333 * 0.0000)]\}$ $= \underline{\mathbf{-0.222}} \Rightarrow \text{CMC for CHD}$ |
| $CMC_{2(\text{Scenario } 1)} = 1 - \{[1 - (\beta_{\text{SatFat}} * \text{SatFatBaselineG4} - \text{SatFatScenario1G4})] * [1 - (\beta_{\text{Salt}} * \text{SaltBaselineG4} - \text{SaltScenario1G4})] * [1 - (\beta_{\text{TransFat}} * \text{TransFatBaselineG4} - \text{TransFatScenario1G4})] * [1 - (\beta_{\text{AddedSugar}} * \text{AddedSugarBaselineG4} - \text{AddedSugarScenario1G4})]\}$ | $CMC_2 = 1 - \{[1 - (0.072947368 * 4.766444)] * [1 - (0.048315789 * 0.696360)] * [1 - (0.165789474 * 0.7123)] * [1 - (0.010453333 * 4.3252)]\}$ $= \underline{\mathbf{0.469}} \Rightarrow \text{CMC for CHD}$       |
| $CMC_{3(\text{Scenario } 1)} = 1 - \{[1 - (\beta_{\text{SatFat}} * \text{SatFatBaselineG2} - \text{SatFatScenario1G2})] * [1 - (\beta_{\text{Salt}} * \text{SaltBaselineG2} - \text{SaltScenario1G2})] * [1 - (\beta_{\text{TransFat}} * \text{TransFatBaselineG2} - \text{TransFatScenario1G2})] * [1 - (\beta_{\text{AddedSugar}} * \text{AddedSugarBaselineG2} - \text{AddedSugarScenario1G2})]\}$ | $CMC_3 = 1 - \{[1 - (0.072947368 * 4.168389)] * [1 - (0.048315789 * 1.197576)] * [1 - (0.165789474 * 0.1497)] * [1 - (0.010453333 * 8.6397)]\}$ $= \underline{\mathbf{0.418}} \Rightarrow \text{CMC for CHD}$       |
| $CMC_{4(\text{Scenario } 1)} = 1 - \{[1 - (\beta_{\text{SatFat}} * \text{SatFatBaselineG3} - \text{SatFatScenario1G3})] * [1 - (\beta_{\text{Salt}} * \text{SaltBaselineG3} - \text{SaltScenario1G3})] * [1 - (\beta_{\text{TransFat}} * \text{TransFatBaselineG3} - \text{TransFatScenario1G3})] * [1 - (\beta_{\text{AddedSugar}} * \text{AddedSugarBaselineG3} - \text{AddedSugarScenario1G3})]\}$ | $CMC_4 = 1 - \{[1 - (0.072947368 * 2.6121)] * [1 - (0.048315789 * 0.5617)] * [1 - (0.165789474 * 0.2734)] * [1 - (0.010453333 * 0.1016)]\}$ $= \underline{\mathbf{0.249}} \Rightarrow \text{CMC for CHD}$           |

**Box 10.2: Cumulative Mortality Changes Equations (Optimistic Scenario) for Stroke**

| Cumulative mortality changes in the <b>Optimistic Scenario</b> :                                                                                                                                                                                                                                                                                                                                      | Example: CMC for Stroke in men under 35 years of age in the <b>Optimistic Scenario</b>                                                                                                                      |
|-------------------------------------------------------------------------------------------------------------------------------------------------------------------------------------------------------------------------------------------------------------------------------------------------------------------------------------------------------------------------------------------------------|-------------------------------------------------------------------------------------------------------------------------------------------------------------------------------------------------------------|
| $CMC_{1(\text{Scenario } 1)} = 1 - \{[1 - (\beta_{\text{SatFat}} * \text{SatFatBaselineG1} - \text{SatFatScenario1G1}) * [1 - (\beta_{\text{Salt}} * \text{SaltBaselineG1} - \text{SaltScenario1G1}) * [1 - (\beta_{\text{TransFat}} * \text{TransFatBaselineG1} - \text{TransFatScenario1G1}) * [1 - (\beta_{\text{AddedSugar}} * \text{AddedSugarBaselineG1} - \text{AddedSugarScenario1G1})]]]]\}$ | $CMC_1 = 1 - \{[1 - (0.018236842 * -2.587365)] * [1 - (0.066789474 * -0.310867)] * [1 - (0.082894737 * -0.078488)] * [1 - (0.010453333 * 0.0000)]\}$ <p align="center">= <b>-0.076</b> → CMC for Stroke</p> |
| $CMC_{2(\text{Scenario } 1)} = 1 - \{[1 - (\beta_{\text{SatFat}} * \text{SatFatBaselineG4} - \text{SatFatScenario1G4}) * [1 - (\beta_{\text{Salt}} * \text{SaltBaselineG4} - \text{SaltScenario1G4}) * [1 - (\beta_{\text{TransFat}} * \text{TransFatBaselineG4} - \text{TransFatScenario1G4}) * [1 - (\beta_{\text{AddedSugar}} * \text{AddedSugarBaselineG4} - \text{AddedSugarScenario1G4})]]]]\}$ | $CMC_2 = 1 - \{[1 - (0.018236842 * 4.766444)] * [1 - (0.066789474 * 0.696360)] * [1 - (0.082894737 * 0.7123)] * [1 - (0.010453333 * 4.3252)]\}$ <p align="center">= <b>0.218</b> → CMC for Stroke</p>       |
| $CMC_{3(\text{Scenario } 1)} = 1 - \{[1 - (\beta_{\text{SatFat}} * \text{SatFatBaselineG2} - \text{SatFatScenario1G2}) * [1 - (\beta_{\text{Salt}} * \text{SaltBaselineG2} - \text{SaltScenario1G2}) * [1 - (\beta_{\text{TransFat}} * \text{TransFatBaselineG2} - \text{TransFatScenario1G2}) * [1 - (\beta_{\text{AddedSugar}} * \text{AddedSugarBaselineG2} - \text{AddedSugarScenario1G2})]]]]\}$ | $CMC_3 = 1 - \{[1 - (0.018236842 * 4.168389)] * [1 - (0.066789474 * 1.197576)] * [1 - (0.082894737 * 0.1497)] * [1 - (0.010453333 * 8.6397)]\}$ <p align="center">= <b>0.236</b> → CMC for Stroke</p>       |
| $CMC_{4(\text{Scenario } 1)} = 1 - \{[1 - (\beta_{\text{SatFat}} * \text{SatFatBaselineG3} - \text{SatFatScenario1G3}) * [1 - (\beta_{\text{Salt}} * \text{SaltBaselineG3} - \text{SaltScenario1G3}) * [1 - (\beta_{\text{TransFat}} * \text{TransFatBaselineG3} - \text{TransFatScenario1G3}) * [1 - (\beta_{\text{AddedSugar}} * \text{AddedSugarBaselineG3} - \text{AddedSugarScenario1G3})]]]]\}$ | $CMC_4 = 1 - \{[1 - (0.018236842 * 2.6121)] * [1 - (0.066789474 * 0.5617)] * [1 - (0.082894737 * 0.2734)] * [1 - (0.010453333 * 0.1016)]\}$ <p align="center">= <b>0.105</b> → CMC for Stroke</p>           |

| <b>Box 10.3: Non-cumulative Mortality Changes Equations (Optimistic Scenario) for CHD</b>                                                                                                                                                                                                                                                                                                      |                                                                                                                                                                                                    |
|------------------------------------------------------------------------------------------------------------------------------------------------------------------------------------------------------------------------------------------------------------------------------------------------------------------------------------------------------------------------------------------------|----------------------------------------------------------------------------------------------------------------------------------------------------------------------------------------------------|
| Non-cumulative mortality changes in the <b>Optimistic Scenario</b> :                                                                                                                                                                                                                                                                                                                           | Example: nCMC for CHD in men under 35 years of age in the <b>Optimistic Scenario</b>                                                                                                               |
| $\text{nCMC}_{1(\text{Scenario } 1)} = \{[(\beta_{\text{SatFat}} * \text{SatFatBaselineG1} - \text{SatFatScenario1G1}) +$ $+ [(\beta_{\text{Salt}} * \text{SaltBaselineG1} - \text{SaltScenario1G1}) +$ $[(\beta_{\text{TransFat}} * \text{TransFatBaselineG1} - \text{TransFatScenario1G1}) +$ $[(\beta_{\text{AddedSugar}} * \text{AddedSugarBaselineG1} - \text{AddedSugarScenario1G1})]\}$ | $\text{nCMC}_1 = \{[0.072947368 * (-2.587365)] + [(0.048315789 * (-$ $0.310867)] + [(0.165789474 * (-0.078488)] + [0.010453333 * 0.0000]\}$ $= \underline{-0.217} \Rightarrow \text{nCMC for CHD}$ |
| $\text{nCMC}_{2(\text{Scenario } 1)} = \{[(\beta_{\text{SatFat}} * \text{SatFatBaselineG4} - \text{SatFatScenario1G4}) +$ $[(\beta_{\text{Salt}} * \text{SaltBaselineG4} - \text{SaltScenario1G4}) +$ $[(\beta_{\text{TransFat}} * \text{TransFatBaselineG4} - \text{TransFatScenario1G4}) +$ $[(\beta_{\text{AddedSugar}} * \text{AddedSugarBaselineG4} - \text{AddedSugarScenario1G4})]\}$   | $\text{nCMC}_2 = \{[0.072947368 * 4.766444] + [0.048315789 * 0.696360] +$ $[0.165789474 * 0.7123] + [0.010453333 * 4.3252]\}$ $= \underline{0.545} \Rightarrow \text{nCMC for CHD}$                |
| $\text{nCMC}_{3(\text{Scenario } 1)} = \{[(\beta_{\text{SatFat}} * \text{SatFatBaselineG2} - \text{SatFatScenario1G2}) +$ $[(\beta_{\text{Salt}} * \text{SaltBaselineG2} - \text{SaltScenario1G2}) +$ $[(\beta_{\text{TransFat}} * \text{TransFatBaselineG2} - \text{TransFatScenario1G2}) +$ $[(\beta_{\text{AddedSugar}} * \text{AddedSugarBaselineG2} - \text{AddedSugarScenario1G2})]\}$   | $\text{nCMC}_3 = \{[0.072947368 * 4.168389] + [0.048315789 * 1.197576] +$ $[0.165789474 * 0.1497] +$ $[0.010453333 * 8.6397]\}$ $= \underline{0.477} \Rightarrow \text{nCMC for CHD}$              |
| $\text{nCMC}_{4(\text{Scenario } 1)} = \{[(\beta_{\text{SatFat}} * \text{SatFatBaselineG3} - \text{SatFatScenario1G3}) +$ $[(\beta_{\text{Salt}} * \text{SaltBaselineG3} - \text{SaltScenario1G3}) +$ $[(\beta_{\text{TransFat}} * \text{TransFatBaselineG3} - \text{TransFatScenario1G3}) +$ $[(\beta_{\text{AddedSugar}} * \text{AddedSugarBaselineG3} - \text{AddedSugarScenario1G3})]\}$   | $\text{nCMC}_4 = \{[0.072947368 * 2.6121] + [0.048315789 * 0.5617] +$ $[0.165789474 * 0.2734] +$ $[0.010453333 * 0.1016]\}$ $= \underline{0.264} \Rightarrow \text{nCMC for CHD}$                  |

| <b>Box 10.4: Non-cumulative Mortality Changes Equations (Optimistic Scenario) for Stroke</b>                                                                                                                                                                                                                                                                                        |                                                                                                                                                                                                          |
|-------------------------------------------------------------------------------------------------------------------------------------------------------------------------------------------------------------------------------------------------------------------------------------------------------------------------------------------------------------------------------------|----------------------------------------------------------------------------------------------------------------------------------------------------------------------------------------------------------|
| Non-cumulative mortality changes in the <b>Optimistic Scenario</b> :                                                                                                                                                                                                                                                                                                                | Example: nCMC for Stroke in men under 35 years of age in the <b>Optimistic Scenario</b>                                                                                                                  |
| $\text{nCMC}_{1(\text{Scenario } 1)} = \{[(\beta_{\text{SatFat}} * \text{SatFatBaselineG1} - \text{SatFatScenario1G1}) + (\beta_{\text{Salt}} * \text{SaltBaselineG1} - \text{SaltScenario1G1}) + (\beta_{\text{TransFat}} * \text{TransFatBaselineG1} - \text{TransFatScenario1G1}) + (\beta_{\text{AddedSugar}} * \text{AddedSugarBaselineG1} - \text{AddedSugarScenario1G1})]\}$ | $\text{nCMC}_1 = \{[0.018236842 * (-2.587365)] + [0.066789474 * (-0.310867)] + [0.082894737 * 0.078488] + [0.010453333 * 0.0000]\}$ <p style="text-align: center;">= <b>-0.074</b> ➔ nCMC for Stroke</p> |
| $\text{nCMC}_{2(\text{Scenario } 1)} = \{[(\beta_{\text{SatFat}} * \text{SatFatBaselineG4} - \text{SatFatScenario1G4}) + (\beta_{\text{Salt}} * \text{SaltBaselineG4} - \text{SaltScenario1G4}) + (\beta_{\text{TransFat}} * \text{TransFatBaselineG4} - \text{TransFatScenario1G4}) + (\beta_{\text{AddedSugar}} * \text{AddedSugarBaselineG4} - \text{AddedSugarScenario1G4})]\}$ | $\text{nCMC}_2 = \{[0.018236842 * 4.766444] + [0.066789474 * 0.696360] + [0.082894737 * 0.7123] + [0.010453333 * 4.3252]\}$ <p style="text-align: center;">= <b>0.238</b> ➔ nCMC for Stroke</p>          |
| $\text{nCMC}_{3(\text{Scenario } 1)} = \{[(\beta_{\text{SatFat}} * \text{SatFatBaselineG2} - \text{SatFatScenario1G2}) + (\beta_{\text{Salt}} * \text{SaltBaselineG2} - \text{SaltScenario1G2}) + (\beta_{\text{TransFat}} * \text{TransFatBaselineG2} - \text{TransFatScenario1G2}) + (\beta_{\text{AddedSugar}} * \text{AddedSugarBaselineG2} - \text{AddedSugarScenario1G2})]\}$ | $\text{nCMC}_3 = \{[0.018236842 * 4.168389] + [0.066789474 * 1.197576] + [0.082894737 * 0.1497] + [0.010453333 * 8.6397]\}$ <p style="text-align: center;">= <b>0.259</b> ➔ nCMC for Stroke</p>          |
| $\text{nCMC}_{4(\text{Scenario } 1)} = \{[(\beta_{\text{SatFat}} * \text{SatFatBaselineG3} - \text{SatFatScenario1G3}) + (\beta_{\text{Salt}} * \text{SaltBaselineG3} - \text{SaltScenario1G3}) + (\beta_{\text{TransFat}} * \text{TransFatBaselineG3} - \text{TransFatScenario1G3}) + (\beta_{\text{AddedSugar}} * \text{AddedSugarBaselineG3} - \text{AddedSugarScenario1G3})]\}$ | $\text{nCMC}_4 = \{[0.018236842 * 2.6121] + [0.066789474 * 0.5617] + [0.082894737 * 0.2734] + [0.010453333 * 0.1016]\}$ <p style="text-align: center;">= <b>0.109</b> ➔ nCMC for Stroke</p>              |



| <b>Box 11. FOOD POLICY MINIMAL SCENARIO</b> |          |        |        |        |         |                                                                                  |        |        |        |         |
|---------------------------------------------|----------|--------|--------|--------|---------|----------------------------------------------------------------------------------|--------|--------|--------|---------|
|                                             | BASELINE |        |        |        |         | Minimal Scenario: Reducing energy intake for G4 to 2008-9 levels, increasing G1. |        |        |        |         |
|                                             | GROUP1   | GROUP2 | GROUP3 | GROUP4 | Total   | GROUP1                                                                           | GROUP2 | GROUP3 | GROUP4 | Total   |
| <b>Daily Caloric</b>                        | 53.40%   | 15.60% | 11.30% | 19.70% | 100.00% | 57.10%                                                                           | 15.60% | 11.30% | 16.00% | 100.00% |

| <b>Box 11.1: Cumulative Mortality Changes Equations (Minimal Scenario) for CHD</b>                                                                                                                                                                                                                                                                                                                          |                                                                                                                                                                                                                              |
|-------------------------------------------------------------------------------------------------------------------------------------------------------------------------------------------------------------------------------------------------------------------------------------------------------------------------------------------------------------------------------------------------------------|------------------------------------------------------------------------------------------------------------------------------------------------------------------------------------------------------------------------------|
| Cumulative mortality changes in the <b>Minimal Scenario</b> :                                                                                                                                                                                                                                                                                                                                               | Example: CMC for <b>CHD</b> in men under 35 years in the <b>Minimal Scenario</b>                                                                                                                                             |
| $\text{CMC}_{1(\text{Scenario } 2)} = 1 - \{[1 - (\beta_{\text{SatFat}} * \text{SatFatBaselineG1} - \text{SatFatScenario2G1}) * [1 - (\beta_{\text{Salt}} * \text{SaltBaselineG1} - \text{SaltScenario2G1})] * [1 - (\beta_{\text{TransFat}} * \text{TransFatBaselineG1} - \text{TransFatScenario2G1})] * [1 - (\beta_{\text{AddedSugar}} * \text{AddedSugarBaselineG1} - \text{AddedSugarScenario2G1})]\}$ | $\text{CMC}_1 = 1 - \{[1 - (0.072947368 * -0.594612)] * [1 - (0.048315789 * -0.071442)] * [1 - (0.165789474 * -0.018038)] * [1 - (0.010453333 * 0.0000)]\}$ <p style="text-align: center;"><b>= -0.050 → CMC for CHD</b></p> |
| $\text{CMC}_{2(\text{Scenario } 2)} = 1 - \{[1 - (\beta_{\text{SatFat}} * \text{SatFatBaselineG4} - \text{SatFatScenario2G4}) * [1 - (\beta_{\text{Salt}} * \text{SaltBaselineG4} - \text{SaltScenario2G4})] * [1 - (\beta_{\text{TransFat}} * \text{TransFatBaselineG4} - \text{TransFatScenario2G4})] * [1 - (\beta_{\text{AddedSugar}} * \text{AddedSugarBaselineG4} - \text{AddedSugarScenario2G4})]\}$ | $\text{CMC}_2 = 1 - \{[1 - (0.072947368 * 2.449423)] * [1 - (0.048315789 * 0.357852)] * [1 - (0.165789474 * 0.3660)] * [1 - (0.010453333 * 2.2227)]\}$ <p style="text-align: center;"><b>= 0.259 → CMC for CHD</b></p>       |

| <b>Box 11.2: Cumulative Mortality Changes Equations (Minimal Scenario) for Stroke</b>                                                                                                                                                                                                                                                                                                                        |                                                                                                                                                                                                                                 |
|--------------------------------------------------------------------------------------------------------------------------------------------------------------------------------------------------------------------------------------------------------------------------------------------------------------------------------------------------------------------------------------------------------------|---------------------------------------------------------------------------------------------------------------------------------------------------------------------------------------------------------------------------------|
| Cumulative mortality changes in the <b>Minimal Scenario</b> :                                                                                                                                                                                                                                                                                                                                                | Example: CMC for Stroke in men under 35 years of age in the <b>Minimal Scenario</b>                                                                                                                                             |
| $\text{CMC}_{1(\text{Scenario } 2)} = 1 - \{[1 - (\beta_{\text{SatFat}} * \text{SatFatBaselineG1} - \text{SatFatScenario2G1}) * [1 - (\beta_{\text{Salt}} * \text{SaltBaselineG1} - \text{SaltScenario2G1})] * [1 - (\beta_{\text{TransFat}} * \text{TransFatBaselineG1} - \text{TransFatScenario2G1})] * [1 - (\beta_{\text{AddedSugar}} * \text{AddedSugarBaselineG1} - \text{AddedSugarScenario2G1})]\}$  | $\text{CMC}_1 = 1 - \{[1 - (0.018236842 * -0.594612)] * [1 - (0.066789474 * -0.071442)] * [1 - (0.082894737 * -0.018038)] * [1 - (0.010453333 * 0.0000)]\}$ <p style="text-align: center;"><b>= -0.017 → CMC for Stroke</b></p> |
| $\text{CMC}_{2(\text{Scenario } 2)} = 1 - \{[1 - (\beta_{\text{SatFat}} * \text{SatFatBaselineG4} - \text{SatFatScenario2G4})] * [1 - (\beta_{\text{Salt}} * \text{SaltBaselineG4} - \text{SaltScenario2G4})] * [1 - (\beta_{\text{TransFat}} * \text{TransFatBaselineG4} - \text{TransFatScenario2G4})] * [1 - (\beta_{\text{AddedSugar}} * \text{AddedSugarBaselineG4} - \text{AddedSugarScenario2G4})]\}$ | $\text{CMC}_2 = 1 - \{[1 - (0.018236842 * 2.449423)] * [1 - (0.066789474 * 0.357852)] * [1 - (0.082894737 * 0.3660)] * [1 - (0.010453333 * 2.2227)]\}$ <p style="text-align: center;"><b>= 0.117 → CMC for Stroke</b></p>       |

| <b>Box 11.3: Non-cumulative Mortality Changes Equations (Minimal Scenario) for CHD</b>                                                                                                                                                                                                                             |                                                                                                                                                                                                     |
|--------------------------------------------------------------------------------------------------------------------------------------------------------------------------------------------------------------------------------------------------------------------------------------------------------------------|-----------------------------------------------------------------------------------------------------------------------------------------------------------------------------------------------------|
| Non-cumulative mortality changes in the <b>Minimal Scenario</b> :                                                                                                                                                                                                                                                  | Example: nCMC for CHD in men under 35 years of age in the <b>Minimal Scenario</b> :                                                                                                                 |
| $\mathbf{nCMC_{1(Scenario\ 2)} = \{[(\beta_{SatFat} * SatFat_{BaselineG1} - SatFat_{Scenario2G1}) + (\beta_{Salt} * Salt_{BaselineG1} - Salt_{Scenario2G1}) + (\beta_{TransFat} * TransFat_{BaselineG1} - TransFat_{Scenario2G1}) + (\beta_{AddedSugar} * AddedSugar_{BaselineG1} - AddedSugar_{Scenario2G1})]\}}$ | $\mathbf{nCMC_1 = \{[(0.072947368 * (-0.594612)) + [(0.048315789 * (-0.071442)) + [(0.165789474 * (-0.018038)) + [(0.010453333 * 0.000000)]]]\}}$<br>$\mathbf{= -0.050 \Rightarrow nCMC\ for\ CHD}$ |
| $\mathbf{nCMC_{2(Scenario\ 2)} = \{[(\beta_{SatFat} * SatFat_{BaselineG4} - SatFat_{Scenario2G4}) + (\beta_{Salt} * Salt_{BaselineG4} - Salt_{Scenario2G4}) + (\beta_{TransFat} * TransFat_{BaselineG4} - TransFat_{Scenario2G4}) + (\beta_{AddedSugar} * AddedSugar_{BaselineG4} - AddedSugar_{Scenario2G4})]\}}$ | $\mathbf{nCMC_2 = \{[(0.072947368 * 2.449423) + [0.048315789 * 0.357852] + [0.165789474 * 0.3660] + [0.010453333 * 2.2227]\}}$<br>$\mathbf{= 0.280 \Rightarrow nCMC\ for\ CHD}$                     |

| <b>Box 11.4: Non-cumulative Mortality Changes Equations (Minimal Scenario) for Stroke</b>                                                                                                                                                                                                                                                                                           |                                                                                                                                                                                                   |
|-------------------------------------------------------------------------------------------------------------------------------------------------------------------------------------------------------------------------------------------------------------------------------------------------------------------------------------------------------------------------------------|---------------------------------------------------------------------------------------------------------------------------------------------------------------------------------------------------|
| nCMC for Stroke in men under 35 years of age in the <b>Minimal Scenario</b> :                                                                                                                                                                                                                                                                                                       | Example: nCMC for Stroke in men under 35 years in the <b>Minimal Scenario</b>                                                                                                                     |
| $\text{nCMC}_{1(\text{Scenario } 2)} = \{[(\beta_{\text{SatFat}} * \text{SatFatBaselineG1} - \text{SatFatScenario2G1}) + (\beta_{\text{Salt}} * \text{SaltBaselineG1} - \text{SaltScenario2G1}) + (\beta_{\text{TransFat}} * \text{TransFatBaselineG1} - \text{TransFatScenario2G1}) + (\beta_{\text{AddedSugar}} * \text{AddedSugarBaselineG1} - \text{AddedSugarScenario2G1})]\}$ | $\text{nCMC}_1 = \{[(0.018236842 * (-0.594612)) + [0.066789474 * (-0.071442)] + [0.082894737 * (-0.018038)] + [0.010453333 * 0.0000]\}$ $= \underline{-0.017} \Rightarrow \text{nCMC for Stroke}$ |
| $\text{nCMC}_{2(\text{Scenario } 2)} = \{[(\beta_{\text{SatFat}} * \text{SatFatBaselineG4} - \text{SatFatScenario2G4}) + (\beta_{\text{Salt}} * \text{SaltBaselineG4} - \text{SaltScenario2G4}) + (\beta_{\text{TransFat}} * \text{TransFatBaselineG4} - \text{TransFatScenario2G4}) + (\beta_{\text{AddedSugar}} * \text{AddedSugarBaselineG4} - \text{AddedSugarScenario2G4})]\}$ | $\text{nCMC}_2 = \{[0.018236842 * 2.449423] + [0.066789474 * 0.357852] + [0.082894737 * 0.3660] + [0.010453333 * 2.2227]\}$ $= \underline{0.122} \Rightarrow \text{nCMC for Stroke}$              |

| <b>Box 12. FOOD POLICY MODEST SCENARIO</b> |          |        |        |        |         |                                             |        |        |        |        |
|--------------------------------------------|----------|--------|--------|--------|---------|---------------------------------------------|--------|--------|--------|--------|
|                                            | BASELINE |        |        |        |         | Modest Scenario: Reducing G2 and G3 by 25%. |        |        |        |        |
|                                            | GROUP1   | GROUP2 | GROUP3 | GROUP4 | Total   | GROUP1                                      | GROUP2 | GROUP3 | GROUP4 | Total  |
| <b>Daily Caloric</b>                       | 53.40%   | 15.60% | 11.30% | 19.70% | 100.00% | 53.40%                                      | 11.70% | 8.47%  | 19.70% | 93.27% |

| <b>Box 12.1: Cumulative Mortality Changes Equations (Modest Scenario) for CHD</b>                                                                                                                                                                                                                                                                                                                                                                                                     |                                                                                                                                                                                                                     |
|---------------------------------------------------------------------------------------------------------------------------------------------------------------------------------------------------------------------------------------------------------------------------------------------------------------------------------------------------------------------------------------------------------------------------------------------------------------------------------------|---------------------------------------------------------------------------------------------------------------------------------------------------------------------------------------------------------------------|
| Cumulative mortality changes in the <b>Modest Scenario</b> :                                                                                                                                                                                                                                                                                                                                                                                                                          | Example: CMC for <b>CHD</b> in men under 35 years in the <b>Modest Scenario</b>                                                                                                                                     |
| $CMC_{1(\text{Scenario } 3)} = 1 - \{[1 - (\beta_{\text{SatFat}} * \text{SatFat}_{\text{BaselineG2}} - \text{SatFat}_{\text{Scenario3G2}})] * [1 - (\beta_{\text{Salt}} * \text{Salt}_{\text{BaselineG2}} - \text{Salt}_{\text{Scenario3G2}})] * [1 - (\beta_{\text{TransFat}} * \text{TransFat}_{\text{BaselineG2}} - \text{TransFat}_{\text{Scenario3G2}})] * [1 - (\beta_{\text{AddedSugar}} * \text{AddedSugar}_{\text{BaselineG2}} - \text{AddedSugar}_{\text{Scenario3G2}})]\}$ | $CMC_1 = 1 - \{[1 - (0.072947368 * 2.902985)] * [1 - (0.048315789 * 0.834026)] * [1 - (0.165789474 * 0.104222)] * [1 - (0.010453333 * 6.016900)]\}$ <p style="text-align: center;">= <b>0.303</b> → CMC for CHD</p> |
| $CMC_{2(\text{Scenario } 3)} = 1 - \{[1 - (\beta_{\text{SatFat}} * \text{SatFat}_{\text{BaselineG3}} - \text{SatFat}_{\text{Scenario3G3}})] * [1 - (\beta_{\text{Salt}} * \text{Salt}_{\text{BaselineG3}} - \text{Salt}_{\text{Scenario3G3}})] * [1 - (\beta_{\text{TransFat}} * \text{TransFat}_{\text{BaselineG3}} - \text{TransFat}_{\text{Scenario3G3}})] * [1 - (\beta_{\text{AddedSugar}} * \text{AddedSugar}_{\text{BaselineG3}} - \text{AddedSugar}_{\text{Scenario3G3}})]\}$ | $CMC_2 = 1 - \{[1 - (0.072947368 * 2.240095)] * [1 - (0.048315789 * 0.481719)] * [1 - (0.165789474 * 0.2344)] * [1 - (0.010453333 * 0.0872)]\}$ <p style="text-align: center;">= <b>0.215</b> → CMC for CHD</p>     |

| <b>Box 12.2: Cumulative Mortality Changes Equations (Modest Scenario) for Stroke</b>                                                                                                                                                                                                                                                                                                                        |                                                                                                                                                                                               |
|-------------------------------------------------------------------------------------------------------------------------------------------------------------------------------------------------------------------------------------------------------------------------------------------------------------------------------------------------------------------------------------------------------------|-----------------------------------------------------------------------------------------------------------------------------------------------------------------------------------------------|
| Cumulative mortality changes in the <b>Modest Scenario</b> :                                                                                                                                                                                                                                                                                                                                                | Example: CMC for Stroke in men under 35 years of age in the <b>Modest Scenario</b>                                                                                                            |
| $\text{CMC}_{1(\text{Scenario } 3)} = 1 - \{[1 - (\beta_{\text{SatFat}} * \text{SatFatBaselineG2} - \text{SatFatScenario3G2}) * [1 - (\beta_{\text{Salt}} * \text{SaltBaselineG2} - \text{SaltScenario3G2}) * [1 - (\beta_{\text{TransFat}} * \text{TransFatBaselineG2} - \text{TransFatScenario3G2}) * [1 - (\beta_{\text{AddedSugar}} * \text{AddedSugarBaselineG2} - \text{AddedSugarScenario3G2})]]]\}$ | $\text{CMC}_1 = 1 - \{[1 - (0.018236842 * 2.902985)] * [1 - (0.066789474 * 0.834026)] * [1 - (0.082894737 * 0.104222)] * [1 - (0.010453333 * 6.016900)]\}$<br>= <b>0.169</b> → CMC for Stroke |
| $\text{CMC}_{2(\text{Scenario } 3)} = 1 - \{[1 - (\beta_{\text{SatFat}} * \text{SatFatBaselineG3} - \text{SatFatScenario3G3}) * [1 - (\beta_{\text{Salt}} * \text{SaltBaselineG3} - \text{SaltScenario3G3}) * [1 - (\beta_{\text{TransFat}} * \text{TransFatBaselineG3} - \text{TransFatScenario3G3}) * [1 - (\beta_{\text{AddedSugar}} * \text{AddedSugarBaselineG3} - \text{AddedSugarScenario3G3})]]]\}$ | $\text{CMC}_2 = 1 - \{[1 - (0.018236842 * 2.240095)] * [1 - (0.066789474 * 0.481719)] * [1 - (0.082894737 * 0.2344)] * [1 - (0.010453333 * 0.0872)]\}$<br>= <b>0.091</b> → CMC for Stroke     |
| <b>Box 12.3: Non-cumulative Mortality Changes Equations (Modest Scenario) for CHD</b>                                                                                                                                                                                                                                                                                                                       |                                                                                                                                                                                               |
| Non-cumulative mortality changes in the <b>Modest Scenario</b> :                                                                                                                                                                                                                                                                                                                                            | Example: nCMC for CHD in men under 35 years of age in the <b>Modest Scenario</b> :                                                                                                            |
| $\text{nCMC}_{1(\text{Scenario } 3)} = \{[(\beta_{\text{SatFat}} * \text{SatFatBaselineG2} - \text{SatFatScenario3G1}) + [(\beta_{\text{Salt}} * \text{SaltBaselineG2} - \text{SaltScenario3G2}) + [(\beta_{\text{TransFat}} * \text{TransFatBaselineG2} - \text{TransFatScenario3G2}) + [(\beta_{\text{AddedSugar}} * \text{AddedSugarBaselineG2} - \text{AddedSugarScenario3G2})]]]\}$                    | $\text{nCMC}_1 = \{[0.072947368 * 2.902985] + [0.048315789 * 0.834026] + [0.165789474 * 0.104222] + [0.010453333 * 6.016900]\}$<br>= <b>0.332</b> → nCMC for CHD                              |
| $\text{nCMC}_{2(\text{Scenario } 3)} = \{[(\beta_{\text{SatFat}} * \text{SatFatBaselineG3} - \text{SatFatScenario3G3}) + [(\beta_{\text{Salt}} * \text{SaltBaselineG3} - \text{SaltScenario3G3}) + [(\beta_{\text{TransFat}} * \text{TransFatBaselineG3} - \text{TransFatScenario3G3}) + [(\beta_{\text{AddedSugar}} * \text{AddedSugarBaselineG3} - \text{AddedSugarScenario3G3})]]]\}$                    | $\text{nCMC}_2 = \{[(0.072947368 * 2.240095) + [0.048315789 * 0.481719] + [0.165789474 * 0.2344] + [0.010453333 * 0.0872]]\}$<br>= <b>0.226</b> → nCMC for CHD                                |

| <b>Box 12.4: Non-cumulative Mortality Changes Equations (Modest Scenario) for Stroke</b>                                                                                                                                                                                                                                                                                              |                                                                                                                                                                                         |
|---------------------------------------------------------------------------------------------------------------------------------------------------------------------------------------------------------------------------------------------------------------------------------------------------------------------------------------------------------------------------------------|-----------------------------------------------------------------------------------------------------------------------------------------------------------------------------------------|
| Non-cumulative mortality changes in the <b>Modest Scenario</b> :                                                                                                                                                                                                                                                                                                                      | Example: nCMC for Stroke in men under 35 years of age in the <b>Modest Scenario</b> :                                                                                                   |
| $\mathbf{nCMC}_{1(\text{Scenario } 3)} = \{[(\beta_{\text{SatFat}} * \text{SatFatBaselineG2} - \text{SatFatScenario3G1}) + (\beta_{\text{Salt}} * \text{SaltBaselineG2} - \text{SaltScenario3G2}) + (\beta_{\text{TransFat}} * \text{TransFatBaselineG2} - \text{TransFatScenario3G2}) + (\beta_{\text{AddedSugar}} * \text{AddedSugarBaselineG2} - \text{AddedSugarScenario3G2})]\}$ | $\mathbf{nCMC}_1 = \{[0.018236842 * 2.902985] + [0.066789474 * 0.834026] + [0.082894737 * 0.104222] + [0.010453333 * 6.016900]\}$ $= \mathbf{0.180} \Rightarrow \text{nCMC for Stroke}$ |
| $\mathbf{nCMC}_{2(\text{Scenario } 3)} = \{[(\beta_{\text{SatFat}} * \text{SatFatBaselineG3} - \text{SatFatScenario3G3}) + (\beta_{\text{Salt}} * \text{SaltBaselineG3} - \text{SaltScenario3G3}) + (\beta_{\text{TransFat}} * \text{TransFatBaselineG3} - \text{TransFatScenario3G3}) + (\beta_{\text{AddedSugar}} * \text{AddedSugarBaselineG3} - \text{AddedSugarScenario3G3})]\}$ | $\mathbf{nCMC}_2 = \{[0.018236842 * 2.240095] + [0.066789474 * 0.481719] + [0.082894737 * 0.2344] + [0.010453333 * 0.0872]\}$ $= \mathbf{0.093} \Rightarrow \text{nCMC for Stroke}$     |

| <b>Box 13. FOOD POLICY INTERMEDIARY SCENARIO</b> |                 |               |               |               |              |                                                                                   |               |               |               |              |
|--------------------------------------------------|-----------------|---------------|---------------|---------------|--------------|-----------------------------------------------------------------------------------|---------------|---------------|---------------|--------------|
|                                                  | <b>BASELINE</b> |               |               |               |              | <b>Intermediary Scenario: Reducing G4 and G2 to 2008-9 levels, increasing G1.</b> |               |               |               |              |
|                                                  | <b>GROUP1</b>   | <b>GROUP2</b> | <b>GROUP3</b> | <b>GROUP4</b> | <b>Total</b> | <b>GROUP1</b>                                                                     | <b>GROUP2</b> | <b>GROUP3</b> | <b>GROUP4</b> | <b>Total</b> |
| <b>Daily Caloric</b>                             | 53.40%          | 15.60%        | 11.30%        | 19.70%        | 100.00%      | 57.10%                                                                            | 11.70%        | 11.30%        | 16.00%        | 96.10%       |

| <b>Box 13.1: Cumulative Mortality Changes Equations (Intermediary Scenario) for CHD</b>                                                                                                                                                                                                                                                                                                                                                                                               |                                                                                                                                                                                                                        |
|---------------------------------------------------------------------------------------------------------------------------------------------------------------------------------------------------------------------------------------------------------------------------------------------------------------------------------------------------------------------------------------------------------------------------------------------------------------------------------------|------------------------------------------------------------------------------------------------------------------------------------------------------------------------------------------------------------------------|
| Cumulative mortality changes in the <b>Intermediary Scenario:</b>                                                                                                                                                                                                                                                                                                                                                                                                                     | Example: CMC for <b>CHD</b> in men under 35 years in the <b>Intermediary Scenario</b>                                                                                                                                  |
| $CMC_{1(\text{Scenario } 4)} = 1 - \{[1 - (\beta_{\text{SatFat}} * \text{SatFat}_{\text{BaselineG1}} - \text{SatFat}_{\text{Scenario4G1}})] * [1 - (\beta_{\text{Salt}} * \text{Salt}_{\text{BaselineG1}} - \text{Salt}_{\text{Scenario4G1}})] * [1 - (\beta_{\text{TransFat}} * \text{TransFat}_{\text{BaselineG1}} - \text{TransFat}_{\text{Scenario4G1}})] * [1 - (\beta_{\text{AddedSugar}} * \text{AddedSugar}_{\text{BaselineG1}} - \text{AddedSugar}_{\text{Scenario4G1}})]\}$ | $CMC_1 = 1 - \{[1 - (0.072947368 * -0.594612)] * [1 - (0.048315789 * -0.071442)] * [1 - (0.165789474 * -0.018038)] * [1 - (0.010453333 * 0.0000)]\}$ $= \underline{\underline{-0.050}} \Rightarrow \text{CMC for CHD}$ |
| $CMC_{2(\text{Scenario } 4)} = 1 - \{[1 - (\beta_{\text{SatFat}} * \text{SatFat}_{\text{BaselineG4}} - \text{SatFat}_{\text{Scenario4G4}})] * [1 - (\beta_{\text{Salt}} * \text{Salt}_{\text{BaselineG4}} - \text{Salt}_{\text{Scenario4G4}})] * [1 - (\beta_{\text{TransFat}} * \text{TransFat}_{\text{BaselineG4}} - \text{TransFat}_{\text{Scenario4G4}})] * [1 - (\beta_{\text{AddedSugar}} * \text{AddedSugar}_{\text{BaselineG4}} - \text{AddedSugar}_{\text{Scenario4G4}})]\}$ | $CMC_2 = 1 - \{[1 - (0.072947368 * 2.449423)] * [1 - (0.048315789 * 0.357852)] * [1 - (0.165789474 * 0.3660)] * [1 - (0.010453333 * 2.2227)]\}$ $= \underline{\underline{0.259}} \Rightarrow \text{CMC for CHD}$       |
| $CMC_{3(\text{Scenario } 4)} = 1 - \{[1 - (\beta_{\text{SatFat}} * \text{SatFat}_{\text{BaselineG2}} - \text{SatFat}_{\text{Scenario4G2}})] * [1 - (\beta_{\text{Salt}} * \text{Salt}_{\text{BaselineG2}} - \text{Salt}_{\text{Scenario4G2}})] * [1 - (\beta_{\text{TransFat}} * \text{TransFat}_{\text{BaselineG2}} - \text{TransFat}_{\text{Scenario4G2}})] * [1 - (\beta_{\text{AddedSugar}} * \text{AddedSugar}_{\text{BaselineG2}} - \text{AddedSugar}_{\text{Scenario4G2}})]\}$ | $CMC_3 = 1 - \{[1 - (0.072947368 * 2.902985)] * [1 - (0.048315789 * 0.834026)] * [1 - (0.165789474 * 0.1042)] * [1 - (0.010453333 * 6.0169)]\}$ $= \underline{\underline{0.303}} \Rightarrow \text{CMC for CHD}$       |



| <b>Box 13.2: Cumulative Mortality Changes Equations (Intermediary Scenario) for Stroke</b>                                                                                                                                                                                                                                                                                                           |                                                                                                                                                                                              |
|------------------------------------------------------------------------------------------------------------------------------------------------------------------------------------------------------------------------------------------------------------------------------------------------------------------------------------------------------------------------------------------------------|----------------------------------------------------------------------------------------------------------------------------------------------------------------------------------------------|
| Cumulative mortality changes in the <b>Intermediary Scenario</b> :                                                                                                                                                                                                                                                                                                                                   | Example: CMC for Stroke in men under 35 years of age in the <b>Intermediary Scenario</b>                                                                                                     |
| $CMC_{1(\text{Scenario } 4)} = 1 - \{[1 - (\beta_{\text{SatFat}} * \text{SatFatBaselineG1} - \text{SatFatScenario4G1}) * [1 - (\beta_{\text{Salt}} * \text{SaltBaselineG1} - \text{SaltScenario4G1}) * [1 - (\beta_{\text{TransFat}} * \text{TransFatBaselineG1} - \text{TransFatScenario4G1}) * [1 - (\beta_{\text{AddedSugar}} * \text{AddedSugarBaselineG1} - \text{AddedSugarScenario4G1})]]]]]$ | $CMC_1 = 1 - \{[1 - (0.018236842 * -0.594612)] * [1 - (0.066789474 * -0.071442)] * [1 - (0.082894737 * -0.018038)] * [1 - (0.010453333 * 0.0000)]\}$ <p>= <b>-0.017</b> → CMC for Stroke</p> |
| $CMC_{2(\text{Scenario } 4)} = 1 - \{[1 - (\beta_{\text{SatFat}} * \text{SatFatBaselineG4} - \text{SatFatScenario4G4}) * [1 - (\beta_{\text{Salt}} * \text{SaltBaselineG4} - \text{SaltScenario4G4}) * [1 - (\beta_{\text{TransFat}} * \text{TransFatBaselineG4} - \text{TransFatScenario4G4}) * [1 - (\beta_{\text{AddedSugar}} * \text{AddedSugarBaselineG4} - \text{AddedSugarScenario4G4})]]]]]$ | $CMC_2 = 1 - \{[1 - (0.018236842 * 2.449423)] * [1 - (0.066789474 * 0.357852)] * [1 - (0.082894737 * 0.3660)] * [1 - (0.010453333 * 2.2227)]\}$ <p>= <b>0.117</b> → CMC for Stroke</p>       |
| $CMC_{3(\text{Scenario } 4)} = 1 - \{[1 - (\beta_{\text{SatFat}} * \text{SatFatBaselineG2} - \text{SatFatScenario4G2}) * [1 - (\beta_{\text{Salt}} * \text{SaltBaselineG2} - \text{SaltScenario4G2}) * [1 - (\beta_{\text{TransFat}} * \text{TransFatBaselineG2} - \text{TransFatScenario4G2}) * [1 - (\beta_{\text{AddedSugar}} * \text{AddedSugarBaselineG2} - \text{AddedSugarScenario4G2})]]]]]$ | $CMC_3 = 1 - \{[1 - (0.018236842 * 2.902985)] * [1 - (0.066789474 * 0.834026)] * [1 - (0.082894737 * 0.1042)] * [1 - (0.010453333 * 6.0169)]\}$ <p>= <b>0.169</b> → CMC for Stroke</p>       |

| <b>Box 13.3: Non-cumulative Mortality Changes Equations (Intermediary Scenario) for CHD</b> |                                                                                        |
|---------------------------------------------------------------------------------------------|----------------------------------------------------------------------------------------|
| Non-cumulative mortality changes in the <b>Intermediary Scenario</b> :                      | Example: nCMC for CHD in men under 35 years of age in the <b>Intermediary Scenario</b> |

|                                                                                                                                                                                                                                                                                                                                                                   |                                                                                                                                                                                                            |
|-------------------------------------------------------------------------------------------------------------------------------------------------------------------------------------------------------------------------------------------------------------------------------------------------------------------------------------------------------------------|------------------------------------------------------------------------------------------------------------------------------------------------------------------------------------------------------------|
| $\mathbf{nCMC}_{1(\text{Scenario 4})} = \{[(\beta\text{SatFat}*\text{SatFatBaselineG1}-\text{SatFatScenario4G1}) +$ $[(\beta\text{Salt}*\text{SaltBaselineG1}-\text{SaltScenario4G1}) +$ $[(\beta\text{TransFat}*\text{TransFatBaselineG1}-\text{TransFatScenario4G1}) +$ $[(\beta\text{AddedSugar}*\text{AddedSugarBaselineG1}-\text{AddedSugarScenario4G1})]\}$ | $\mathbf{nCMC}_1 = \{[(0.072947368*(-0.594612)) + [(0.048315789*(-$ $0.071442)] + [(0.165789474*(-0.018038)] +$ $[(0.010453333*0.000000)]\}$ $= \mathbf{-0.050} \Rightarrow \mathbf{nCMC \text{ for CHD}}$ |
| $\mathbf{nCMC}_{2(\text{Scenario 4})} = \{[(\beta\text{SatFat}*\text{SatFatBaselineG4}-\text{SatFatScenario4G4}) +$ $[(\beta\text{Salt}*\text{SaltBaselineG4}-\text{SaltScenario4G4}) +$ $[(\beta\text{TransFat}*\text{TransFatBaselineG4}-\text{TransFatScenario4G4}) +$ $[(\beta\text{AddedSugar}*\text{AddedSugarBaselineG4}-\text{AddedSugarScenario4G4})]\}$ | $\mathbf{nCMC}_2 = \{[(0.072947368*2.449423) + [(0.048315789*0.357852) +$ $[(0.165789474*0.3660) + [(0.010453333*2.2227)]\}$ $= \mathbf{0.280} \Rightarrow \mathbf{nCMC \text{ for CHD}}$                  |
| $\mathbf{nCMC}_{3(\text{Scenario 4})} = \{[(\beta\text{SatFat}*\text{SatFatBaselineG2}-\text{SatFatScenario4G2}) +$ $[(\beta\text{Salt}*\text{SaltBaselineG2}-\text{SaltScenario4G2}) +$ $[(\beta\text{TransFat}*\text{TransFatBaselineG2}-\text{TransFatScenario4G2}) +$ $[(\beta\text{AddedSugar}*\text{AddedSugarBaselineG2}-\text{AddedSugarScenario4G2})]\}$ | $\mathbf{nCMC}_3 = \{[(0.072947368*2.902985) + [(0.048315789*0.834026) +$ $[(0.165789474*0.104222) + [(0.010453333*6.016900)]\}$ $= \mathbf{0.332} \Rightarrow \mathbf{nCMC \text{ for CHD}}$              |

| <b>Box 13.4: Non-cumulative Mortality Changes Equations (Intermediary Scenario) for Stroke</b>                                                                                                                                                                                                                                                                                  |                                                                                                                                                                                                        |
|---------------------------------------------------------------------------------------------------------------------------------------------------------------------------------------------------------------------------------------------------------------------------------------------------------------------------------------------------------------------------------|--------------------------------------------------------------------------------------------------------------------------------------------------------------------------------------------------------|
| nCMC for Stroke in men under 35 years of age in the <b>Intermediary Scenario</b>                                                                                                                                                                                                                                                                                                | Example: nCMC for Stroke in men under 35 years of age in the <b>Intermediary Scenario</b>                                                                                                              |
| $\text{nCMC}_{1(\text{Scenario 4})} = \{[(\beta\text{SatFat} * \text{SatFatBaselineG1} - \text{SatFatScenario4G1}) +$ $[(\beta\text{Salt} * \text{SaltBaselineG1} - \text{SaltScenario4G1}) +$ $[(\beta\text{TransFat} * \text{TransFatBaselineG1} - \text{TransFatScenario4G1}) +$ $[(\beta\text{AddedSugar} * \text{AddedSugarBaselineG1} - \text{AddedSugarScenario4G1})]\}$ | $\text{nCMC}_1 = \{[(0.018236842 * (-0.594612)) + [0.066789474 * (-$ $0.071442)] + [0.082894737 * (-0.018038)] +$ $[0.010453333 * 0.0000]\}$ $= \underline{-0.017} \Rightarrow \text{nCMC for Stroke}$ |
| $\text{nCMC}_2 (\text{Scenario 4}) = \{[(\beta\text{SatFat} * \text{SatFatBaselineG4} - \text{SatFatScenario4G4}) +$ $[(\beta\text{Salt} * \text{SaltBaselineG4} - \text{SaltScenario4G4}) +$ $[(\beta\text{TransFat} * \text{TransFatBaselineG4} - \text{TransFatScenario4G4}) +$ $[(\beta\text{AddedSugar} * \text{AddedSugarBaselineG4} - \text{AddedSugarScenario4G4})]\}$  | $\text{nCMC}_2 = \{[(0.018236842 * 2.449423) + [0.066789474 * 0.357852] +$ $[0.082894737 * 0.3660] + [0.010453333 * 2.2227]\}$ $= \underline{0.122} \Rightarrow \text{nCMC for Stroke}$                |
| $\text{nCMC}_3 (\text{Scenario 4}) = \{[(\beta\text{SatFat} * \text{SatFatBaselineG2} - \text{SatFatScenario4G2}) +$ $[(\beta\text{Salt} * \text{SaltBaselineG2} - \text{SaltScenario4G2}) +$ $[(\beta\text{TransFat} * \text{TransFatBaselineG2} - \text{TransFatScenario4G2}) +$ $[(\beta\text{AddedSugar} * \text{AddedSugarBaselineG2} - \text{AddedSugarScenario4G2})]\}$  | $\text{nCMC}_3 = \{[(0.018236842 * 2.902985) + [0.066789474 * 0.834026] +$ $[0.082894737 * 0.104222] + [0.010453333 * 6.016900]\}$ $= \underline{0.180} \Rightarrow \text{nCMC for Stroke}$            |

| Box 14. FOOD POLICY ADVANCED SCENARIO |          |        |        |        |         |                                                                              |        |        |        |        |
|---------------------------------------|----------|--------|--------|--------|---------|------------------------------------------------------------------------------|--------|--------|--------|--------|
|                                       | BASELINE |        |        |        |         | Advanced Scenario: Reducing G4 to 2008-9 levels, increase G1 reducing G2/G3. |        |        |        |        |
|                                       | GROUP1   | GROUP2 | GROUP3 | GROUP4 | Total   | GROUP1                                                                       | GROUP2 | GROUP3 | GROUP4 | Total  |
| Daily Caloric                         | 53.40%   | 15.60% | 11.30% | 19.70% | 100.00% | 57.10%                                                                       | 11.70% | 8.47%  | 16.00% | 93.27% |

| Box 14.1: Cumulative Mortality Changes Equations (Advanced Scenario) for CHD                                                                                                                                                                                                                                                      |                                                                                                                                                                                       |
|-----------------------------------------------------------------------------------------------------------------------------------------------------------------------------------------------------------------------------------------------------------------------------------------------------------------------------------|---------------------------------------------------------------------------------------------------------------------------------------------------------------------------------------|
| Cumulative mortality changes in the <b>Advanced Scenario</b> :                                                                                                                                                                                                                                                                    | Example: CMC for CHD in men under 35 years in the <b>Advanced Scenario</b>                                                                                                            |
| $CMC_{1(Scenario\ 5)} = 1 - \{[1 - (\beta_{SatFat} * SatFat_{BaselineG1} - SatFat_{Scenario5G1}) * [1 - (\beta_{Salt} * Salt_{BaselineG1} - Salt_{Scenario5G1}) * [1 - (\beta_{TransFat} * TransFat_{BaselineG1} - TransFat_{Scenario5G1}) * [1 - (\beta_{AddedSugar} * AddedSugar_{BaselineG1} - AddedSugar_{Scenario5G1})]]]]]$ | $CMC_1 = 1 - \{[1 - (0.072947368 * -0.594612)] * [1 - (0.048315789 * -0.071442)] * [1 - (0.165789474 * -0.018038)] * [1 - (0.010453333 * 0.0000)]\}$<br>= <b>-0.050</b> → CMC for CHD |
| $CMC_{2(Scenario\ 5)} = 1 - \{[1 - (\beta_{SatFat} * SatFat_{BaselineG4} - SatFat_{Scenario5G4}) * [1 - (\beta_{Salt} * Salt_{BaselineG4} - Salt_{Scenario5G4}) * [1 - (\beta_{TransFat} * TransFat_{BaselineG4} - TransFat_{Scenario5G4}) * [1 - (\beta_{AddedSugar} * AddedSugar_{BaselineG4} - AddedSugar_{Scenario5G4})]]]]]$ | $CMC_2 = 1 - \{[1 - (0.072947368 * 2.449423)] * [1 - (0.048315789 * 0.357852)] * [1 - (0.165789474 * 0.3660)] * [1 - (0.010453333 * 2.2227)]\}$<br>= <b>0.259</b> → CMC for CHD       |
| $CMC_{3(Scenario\ 5)} = 1 - \{[1 - (\beta_{SatFat} * SatFat_{BaselineG2} - SatFat_{Scenario5G2}) * [1 - (\beta_{Salt} * Salt_{BaselineG2} - Salt_{Scenario5G2}) * [1 - (\beta_{TransFat} * TransFat_{BaselineG2} - TransFat_{Scenario5G2}) * [1 - (\beta_{AddedSugar} * AddedSugar_{BaselineG2} - AddedSugar_{Scenario5G2})]]]]]$ | $CMC_3 = 1 - \{[1 - (0.072947368 * 2.902985)] * [1 - (0.048315789 * 0.834026)] * [1 - (0.165789474 * 0.1042)] * [1 - (0.010453333 * 6.0169)]\}$<br>= <b>0.303</b> → CMC for CHD       |
| $CMC_{4(Scenario\ 5)} = 1 - \{[1 - (\beta_{SatFat} * SatFat_{BaselineG3} - SatFat_{Scenario5G2}) * [1 - (\beta_{Salt} * Salt_{BaselineG3} - Salt_{Scenario5G2}) * [1 - (\beta_{TransFat} * TransFat_{BaselineG3} - TransFat_{Scenario5G2}) * [1 - (\beta_{AddedSugar} * AddedSugar_{BaselineG3} - AddedSugar_{Scenario5G2})]]]]]$ | $CMC_4 = 1 - \{[1 - (0.072947368 * 2.240095)] * [1 - (0.048315789 * 0.481719)] * [1 - (0.165789474 * 0.2344)] * [1 - (0.010453333 * 0.0872)]\}$                                       |

|                                                                                                                                                                                                                                                                                                                                                                   |                                                                                                                                                                                            |
|-------------------------------------------------------------------------------------------------------------------------------------------------------------------------------------------------------------------------------------------------------------------------------------------------------------------------------------------------------------------|--------------------------------------------------------------------------------------------------------------------------------------------------------------------------------------------|
| $(\beta\text{TransFat}*\text{TransFatBaselineG3}-\text{TransFatScenario5G3})*[1-(\beta\text{AddedSugar}*\text{AddedSugarBaselineG3}-\text{AddedSugarScenario5G3})]$                                                                                                                                                                                               | = <b>0.215</b> $\Rightarrow$ CMC for CHD                                                                                                                                                   |
| <b>Box 14.2: Cumulative Mortality Changes Equations (Advanced Scenario) for Stroke</b>                                                                                                                                                                                                                                                                            |                                                                                                                                                                                            |
| Cumulative mortality changes in the <b>Advanced Scenario</b> :                                                                                                                                                                                                                                                                                                    | Example: CMC for Stroke in men under 35 years of age in the <b>Advanced Scenario</b>                                                                                                       |
| $\text{CMC}_{1(\text{Scenario } 5)} = 1 - \{[1-(\beta\text{SatFat}*\text{SatFatBaselineG1}-\text{SatFatScenario5G1})*[1-(\beta\text{Salt}*\text{SaltBaselineG1}-\text{SaltScenario5G1})]*[1-(\beta\text{TransFat}*\text{TransFatBaselineG1}-\text{TransFatScenario5G1})]*[1-(\beta\text{AddedSugar}*\text{AddedSugarBaselineG1}-\text{AddedSugarScenario5G1})]\}$ | $\text{CMC}_1 = 1 - \{[1-(0.018236842*-0.594612)] * [1-(0.066789474*0.071442)] * [1-(0.082894737*-0.018038)] * [1-(0.010453333*0.0000)]\}$<br>= <b>-0.017</b> $\Rightarrow$ CMC for Stroke |
| $\text{CMC}_{2(\text{Scenario } 5)} = 1 - \{[1-(\beta\text{SatFat}*\text{SatFatBaselineG4}-\text{SatFatScenario5G4})*[1-(\beta\text{Salt}*\text{SaltBaselineG4}-\text{SaltScenario5G4})]*[1-(\beta\text{TransFat}*\text{TransFatBaselineG4}-\text{TransFatScenario5G4})]*[1-(\beta\text{AddedSugar}*\text{AddedSugarBaselineG4}-\text{AddedSugarScenario5G4})]\}$ | $\text{CMC}_2 = 1 - \{[1-(0.018236842*2.449423)] * [1-(0.066789474*0.357852)] * [1-(0.082894737*0.3660)] * [1-(0.010453333*2.2227)]\}$<br>= <b>0.117</b> $\Rightarrow$ CMC for Stroke      |
| $\text{CMC}_{3(\text{Scenario } 5)} = 1 - \{[1-(\beta\text{SatFat}*\text{SatFatBaselineG2}-\text{SatFatScenario5G2})*[1-(\beta\text{Salt}*\text{SaltBaselineG2}-\text{SaltScenario5G2})]*[1-(\beta\text{TransFat}*\text{TransFatBaselineG2}-\text{TransFatScenario5G2})]*[1-(\beta\text{AddedSugar}*\text{AddedSugarBaselineG2}-\text{AddedSugarScenario5G2})]\}$ | $\text{CMC}_3 = 1 - \{[1-(0.018236842*2.902985)] * [1-(0.066789474*0.834026)] * [1-(0.082894737*0.1042)] * [1-(0.010453333*6.0169)]\}$<br>= <b>0.169</b> $\Rightarrow$ CMC for Stroke      |
| $\text{CMC}_{4(\text{Scenario } 5)} = 1 - \{[1-(\beta\text{SatFat}*\text{SatFatBaselineG3}-\text{SatFatScenario5G2})*[1-(\beta\text{Salt}*\text{SaltBaselineG3}-\text{SaltScenario5G2})]*[1-(\beta\text{TransFat}*\text{TransFatBaselineG3}-\text{TransFatScenario5G3})]*[1-(\beta\text{AddedSugar}*\text{AddedSugarBaselineG3}-\text{AddedSugarScenario5G3})]\}$ | $\text{CMC}_4 = 1 - \{[1-(0.018236842*2.240095)] * [1-(0.066789474*0.481719)] * [1-(0.082894737*0.2344)] * [1-(0.010453333*0.0872)]\}$<br>= <b>0.091</b> $\Rightarrow$ CMC for Stroke      |

| <b>Box 14.3: Non-cumulative Mortality Changes Equations (Advanced Scenario) for CHD</b>                                                                                                                                                                                                                                                                                          |                                                                                                                                                                                                                    |
|----------------------------------------------------------------------------------------------------------------------------------------------------------------------------------------------------------------------------------------------------------------------------------------------------------------------------------------------------------------------------------|--------------------------------------------------------------------------------------------------------------------------------------------------------------------------------------------------------------------|
| Non-cumulative mortality changes in the <b>Advanced Scenario</b> :                                                                                                                                                                                                                                                                                                               | Example: nCMC for CHD in men under 35 years of age in the <b>Advanced Scenario</b>                                                                                                                                 |
| $\text{nCMC}_{1(\text{Scenario } 5)} = \{[(\beta\text{SatFat} * \text{SatFatBaselineG1} - \text{SatFatScenario5G1}) +$ $[(\beta\text{Salt} * \text{SaltBaselineG1} - \text{SaltScenario5G1}) +$ $[(\beta\text{TransFat} * \text{TransFatBaselineG1} - \text{TransFatScenario5G1}) +$ $[(\beta\text{AddedSugar} * \text{AddedSugarBaselineG1} - \text{AddedSugarScenario5G1})]\}$ | $\text{nCMC}_1 = \{[(0.072947368 * (-0.594612)) + [(0.048315789 * (-$ $0.071442)] + [(0.165789474 * (-0.018038)] +$ $[(0.010453333 * 0.000000)]\}$ $= \underline{\mathbf{-0.050}} \Rightarrow \text{nCMC for CHD}$ |
| $\text{nCMC}_{2(\text{Scenario } 5)} = \{[(\beta\text{SatFat} * \text{SatFatBaselineG4} - \text{SatFatScenario5G4}) +$ $[(\beta\text{Salt} * \text{SaltBaselineG4} - \text{SaltScenario5G4}) +$ $[(\beta\text{TransFat} * \text{TransFatBaselineG4} - \text{TransFatScenario5G4}) +$ $[(\beta\text{AddedSugar} * \text{AddedSugarBaselineG4} - \text{AddedSugarScenario5G4})]\}$ | $\text{nCMC}_2 = \{[(0.072947368 * 2.449423) + [(0.048315789 * 0.357852) +$ $[(0.165789474 * 0.3660) + [(0.010453333 * 2.2227)]\}$ $= \underline{\mathbf{0.280}} \Rightarrow \text{nCMC for CHD}$                  |
| $\text{nCMC}_{3(\text{Scenario } 5)} = \{[(\beta\text{SatFat} * \text{SatFatBaselineG2} - \text{SatFatScenario5G2}) +$ $[(\beta\text{Salt} * \text{SaltBaselineG2} - \text{SaltScenario5G2}) +$ $[(\beta\text{TransFat} * \text{TransFatBaselineG2} - \text{TransFatScenario5G2}) +$ $[(\beta\text{AddedSugar} * \text{AddedSugarBaselineG2} - \text{AddedSugarScenario5G2})]\}$ | $\text{nCMC}_3 = \{[(0.072947368 * 2.902985) + [(0.048315789 * 0.834026) +$ $[(0.165789474 * 0.104222) + [(0.010453333 * 6.016900)]\}$ $= \underline{\mathbf{0.332}} \Rightarrow \text{nCMC for CHD}$              |
| $\text{nCMC}_{4(\text{Scenario } 5)} = \{[(\beta\text{SatFat} * \text{SatFatBaselineG3} - \text{SatFatScenario5G3}) +$ $[(\beta\text{Salt} * \text{SaltBaselineG3} - \text{SaltScenario5G3}) +$ $[(\beta\text{TransFat} * \text{TransFatBaselineG3} - \text{TransFatScenario5G3}) +$ $[(\beta\text{AddedSugar} * \text{AddedSugarBaselineG3} - \text{AddedSugarScenario5G3})]\}$ | $\text{nCMC}_4 = \{[(0.072947368 * 2.240095) + [(0.048315789 * 0.481719) +$ $[(0.165789474 * 0.2344) + [(0.010453333 * 0.0872)]\}$ $= \underline{\mathbf{0.226}} \Rightarrow \text{nCMC for CHD}$                  |

| <b>Box 14.4: Non-cumulative Mortality Changes Equations (Advanced Scenario) for Stroke</b>                                                                                                                                                               |                                                                                                                                                                     |
|----------------------------------------------------------------------------------------------------------------------------------------------------------------------------------------------------------------------------------------------------------|---------------------------------------------------------------------------------------------------------------------------------------------------------------------|
| Non-cumulative mortality changes in the <b>Advanced Scenario</b> :                                                                                                                                                                                       | Example: nCMC for Stroke in men under 35 years of age in the <b>Advanced Scenario</b>                                                                               |
| <b>CMC<sub>1</sub>(Scenario 5) = 1- {[1-(βSatFat*SatFatBaselineG1-SatFatScenario5G1)*[1-(βSalt*SaltBaselineG1-SaltScenario5G1)*[1-(βTransFat*TransFatBaselineG1-TransFatScenario5G1)]]*(βAddedSugar*AddedSugarBaselineG1-AddedSugarScenario5G1)]}</b>    | nCMC <sub>1</sub> = {[0.018236842*(-0.594612)] + [0.066789474*(-0.071442)] + [0.082894737*(-0.018038)] + [0.010453333*0.0000]}<br>= <b>-0.017</b> ➔ nCMC for Stroke |
| <b>CMC<sub>2</sub>(Scenario 5) = 1- {[1-(βSatFat*SatFatBaselineG4-SatFatScenario5G4)*[1-(βSalt*SaltBaselineG4-SaltScenario5G4)*[1-(βTransFat*TransFatBaselineG4-TransFatScenario5G4)]]*(βAddedSugar*AddedSugarBaselineG4-AddedSugarScenario5G4)]}</b>    | nCMC <sub>2</sub> = {[0.018236842*2.449423] + [0.066789474*0.357852] + [0.082894737*0.3660] + [0.010453333*2.2227]}<br>= <b>0.122</b> ➔ nCMC for Stroke             |
| <b>CMC<sub>3</sub>(Scenario 5) = 1- 1- {[1-(βSatFat*SatFatBaselineG2-SatFatScenario5G2)*[1-(βSalt*SaltBaselineG2-SaltScenario5G2)*[1-(βTransFat*TransFatBaselineG2-TransFatScenario5G2)]]*(βAddedSugar*AddedSugarBaselineG2-AddedSugarScenario5G2)]}</b> | nCMC <sub>3</sub> = {[0.018236842*2.902985] + [0.066789474*0.834026] + [0.082894737*0.104222] + [0.010453333*6.016900]}<br>= <b>0.180</b> ➔ nCMC for Stroke         |
| <b>CMC<sub>4</sub>(Scenario 5) = 1- 1- {[1-(βSatFat*SatFatBaselineG3-SatFatScenario5G2)*[1-(βSalt*SaltBaselineG3-SaltScenario5G2)*[1-(βTransFat*TransFatBaselineG3-TransFatScenario5G3)]]*(βAddedSugar*AddedSugarBaselineG3-AddedSugarScenario5G3)]}</b> | nCMC <sub>4</sub> = {[0.018236842*2.240095] + [0.066789474*0.481719] + [0.082894737*0.2344] + [0.010453333*0.0872]}<br>= <b>0.093</b> ➔ nCMC for Stroke             |

As there are multiple variables involved in these equations it is important to ensure that the beta value is correct for the relevant age group, gender and outcome (CHD or Stroke) that is being calculated. This applies to calculations for both CMC and nCMC.

### 1b.3 Estimating the reduction in deaths with cumulative and non-cumulative effects

Finally, to precisely estimate absolute figures for mortality reduction we multiplied the predicted change (CMC or nCMC) by the projected population in 2048. The projected figures used account for changes in population demographic as well as simply population size. This is important, given the distribution of CVD mortality.

Once again, generic formulas are given along with an example. The examples all apply to men under 35 years of age.

#### Reduction in CHD mortality using cumulative effects:

$$\begin{aligned} & \text{Expected Deaths from CHD} * \text{CMC}_1 + \text{Expected Deaths from CHD} * \text{CMC}_2 + \text{Expected} \\ & \text{Deaths from CHD} * \text{CMC}_3^i + \text{Expected Deaths from CHD} * \text{CMC}_4^i \\ & \text{Expected Deaths for CHD} = \text{age group CHD mortality rate in 2018} * \text{projected} \\ & \text{population demographics in 2048} \end{aligned}$$

i – when present in the scenarios

Examples:

Reduction in CHD mortality for men under 35 years of age in the Optimistic Scenario using cumulative effects:

$$= [1346 * (-0.222)] + (1346 * 0.469) + (1346 * 0.418) + (1346 * 0.249) = \underline{\underline{1231}}$$

Reduction in CHD mortality for men under 35 years of age in the Minimal Scenario using cumulative effects:

$$= [1346 * (-0.050)] + (1346 * 0.259) = \underline{\underline{282}}$$

Reduction in CHD mortality for men under 35 years of age in the Modest Scenario using cumulative effects:

$$= (1346 * 0.303) + (1346 * 0.215) = \underline{\underline{698}}$$

Reduction in CHD mortality for men under 35 years of age in the Intermediary Scenario using cumulative effects:



$$= [1346*(-0.050)] + (1346*0.259) + (1346*0.303) = \underline{690}$$

Reduction in CHD mortality for men under 35 years of age in the Advanced Scenario using cumulative effects:

$$= [1346*(-0.050)] + (1346*0.259) + (1346*0.303) + (1346*0.215) = \underline{980}$$

Reduction in CHD mortality using non-cumulative effects:

Expected Deaths from CHD\*nCMC<sub>1</sub> + Expected Deaths from CHD\*nCMC<sub>2</sub> +  
Expected Deaths from CHD\*nCMC<sub>3</sub><sup>i</sup> + Expected Deaths from CHD\*nCMC<sub>4</sub><sup>i</sup>  
Expected Deaths for CHD = age group CHD mortality rate in 2018\* projected  
population demographics in 2048

<sup>i</sup> – when present in the scenarios

Examples:

Reduction in CHD mortality for men under 35 years of age in the Optimistic Scenario using cumulative effects:

$$= [1346*(-0.217)] + (1346*0.545) + (1346*0.477) + (1346*0.264) = \underline{1439}$$

Reduction in CHD mortality for men under 35 years of age in the Minimal Scenario using non-cumulative effects:

$$= [1346*(-0.0050)] + (1346*0.280) = \underline{310}$$

Reduction in CHD mortality for men under 35 years of age in Modest Scenario using non-cumulative effects:

$$= (1346*0.332) + (1346*0.226) = \underline{752}$$

Reduction in CHD mortality for men under 35 years of age in the Intermediary Scenario using cumulative effects:

$$= [1346*(-0.0050)] + (1346*0.280) + (1346*0.332) = \underline{757}$$

Reduction in CHD mortality for men under 35 years of age in the Advanced Scenario using cumulative effects:

$$= [1346*(-0.0050)] + (1346*0.280) + (1346*0.332) + (1346*0.226) = \mathbf{1062}$$

Reduction in stroke mortality using cumulative effects:

$$\begin{aligned} & \text{Expected Deaths from stroke*CMC}_1 + \text{Expected Deaths from stroke*CMC}_2 + \text{Expected} \\ & \text{Deaths from stroke*CMC}_3^i + \text{Expected Deaths from stroke*CMC}_4^i \\ & \text{Expected Deaths for Stroke} = \text{age group Stroke mortality rate in 2018* projected} \\ & \text{population demographics in 2048} \\ & i - \text{when present in the scenarios} \end{aligned}$$

Examples:

Reduction in **stroke** mortality for men under 35 years of age in the Optimistic Scenario using cumulative effects:

$$= [348*(-0.076)] + (348*0.218) + (348*0.236) + (348*0.105) = \mathbf{168}$$

Reduction in **stroke** mortality for men under 35 years of age in the Minimal Scenario using cumulative effects:

$$= [348*(-0.017)] + (348*0.117) = \mathbf{35}$$

Reduction in stroke mortality for men under 35 years of age in the Modest Scenario using cumulative effects:

$$= (348*0.169) + (348*0.091) = \mathbf{90}$$

Reduction in stroke mortality for men under 35 years of age in the Intermediary Scenario using cumulative effects:

$$= [348*(-0.017)] + (348*0.117) + (348*0.169) = \mathbf{94}$$

Reduction in stroke mortality for men under 35 years of age in the Advanced Scenario using cumulative effects:

$$= [348*(-0.017)] + (348*0.117) + (348*0.169) + (348*0.091) = \underline{125}$$

Reduction in stroke mortality using non-cumulative effects:

Expected Deaths from stroke\*nCMC<sub>1</sub>+ Expected Deaths from stroke\*nCMC<sub>2</sub> +  
 Expected Deaths from stroke\*nCMC<sub>3</sub><sup>i</sup> + Expected Deaths from stroke\*nCMC<sub>4</sub><sup>i</sup>  
 Expected Deaths for Stroke = age group Stroke mortality rate in 2018\* projected  
 population demographics in 2048

i – when present in the scenarios

Examples:

Reduction in stroke mortality for men under 35 years of age in the Optimistic Scenario using non-cumulative effects:

$$= [348*(-0.074)] + (348*0.238) + (348*0.259) + (348*0.109) = \underline{185}$$

Reduction in stroke mortality for men under 35 years of age in the Minimal Scenario using non-cumulative effects:

$$= [348*(-0.017)] + (348*0.122) = \underline{37}$$

Reduction in stroke mortality for men under 35 years of age in the Modest Scenario using non-cumulative effects:

$$= (348*0.180) + (348*0.093) = \underline{95}$$

Reduction in stroke mortality for men under 35 years of age in the Intermediary Scenario using non-cumulative effects:

$$= [348*(-0.017)] + (348*0.122)) + (348*0.180) = \underline{99}$$

Reduction in stroke mortality for men under 35 years of age in the Advanced Scenario using non-cumulative effects:

$$= [348*(-0.017)] + (348*0.122)) + (348*0.180) + (348*0.093) = \underline{132}$$

The same reasoning and process is applied to all age groups and both sexes in all scenarios. The figures derived from the examples given above are shown in the following box (Box 15):

Box 15: Number of reductions in CHD and stroke deaths in Scenarios 1, 2, 3, 4 and 5 (age group under 35 male)

| Age group < 35<br>Male             | Reduction in CHD deaths<br>Scenarios |     |     |     |      | Reduction in Stroke Deaths<br>Scenarios |    |    |    |     |
|------------------------------------|--------------------------------------|-----|-----|-----|------|-----------------------------------------|----|----|----|-----|
|                                    | 1                                    | 2   | 3   | 4   | 5    | 1                                       | 2  | 3  | 4  | 5   |
| <b>With cumulative effects</b>     | 1231                                 | 282 | 698 | 690 | 980  | 168                                     | 35 | 90 | 94 | 125 |
| <b>With non-cumulative effects</b> | 1439                                 | 310 | 752 | 757 | 1062 | 185                                     | 37 | 95 | 99 | 132 |

### 1c Describing the probabilistic sensitive analysis (PSA)

Every model involves uncertainty. To explore the potential effects of reducing consumption of UPF on risk factors and CVD deaths we performed a probabilistic sensitivity analysis. Simulations were performed using the Monte Carlo methodology. This allowed stochastic variation of parameters based on the sizes of the effects obtained from the literature. Using this technique, we were able to recalculate the model iteratively. Confidence intervals of 95% were generated for the median using the bootstrap percentile method. The model simulation was implemented using MS Excel with the addition of the package Ersatz ([www.epigear.com](http://www.epigear.com)).

Box 16. shows the distribution of values used for each nutrient/food input.

| Box 16: Standard distribution function used in the model |                                                                        |
|----------------------------------------------------------|------------------------------------------------------------------------|
| Nutrient/food                                            | Distribution used                                                      |
| <b>Salt</b>                                              | Erpert *= (lower confidence interval, mean, upper confidence interval) |
| <b>Saturated Fat</b>                                     | Erpert *= (lower confidence interval, mean, upper confidence interval) |
| <b>Trans-fat</b>                                         | Erpert *= (lower confidence interval, mean, upper confidence interval) |
| <b>Added sugar</b>                                       | Erpert *= (lower confidence interval, mean, upper confidence interval) |

\*Erpert = Pert standard distribution function

## Section 2. RESULTS

### 2.a Nutrient level in different food groups

Table 1 shows the average nutrient intake from each food group for the entire sample population (males and females of all age groups).

|                              | <b>G1</b>        | <b>G2</b>        | <b>G3</b>        | <b>G4</b>        |
|------------------------------|------------------|------------------|------------------|------------------|
|                              | <b>Mean (SD)</b> | <b>Mean (SD)</b> | <b>Mean (SD)</b> | <b>Mean (SD)</b> |
| <b>Food/Nutrient</b>         |                  |                  |                  |                  |
| <b>Salt intake (g/day)</b>   | 0.91 (0.49)      | 2.75 (1.27)      | 1.90 (1.49)      | 1.60 (1.05)      |
| <b>Saturated Fat (g/day)</b> | 8.04 (3.83)      | 3.33 (2.51)      | 3.22 (3.60)      | 5.30 (3.41)      |
| <b>Trans Fat (g/day)</b>     | 0.22 (0.13)      | 0.12 (0.11)      | 0.36 (0.30)      | 0.51 (3.24)      |
| <b>Added sugar (g/day)</b>   | NA               | 17.14 (20.39)    | 0.51 (3.24)      | 11.14 (10.35)    |

Tables 2 and 3 show salt from G1 and G2, G3 and G4, respectively. Results are stratified by age group and gender.

Table 2: Salt inputs by age and gender in G1 and G2 – Baseline

| <b>Age and gender</b> | <b>SALT in Group 1 (g)</b> |                |                | <b>SALT in Group 2 (g)</b> |                |                |
|-----------------------|----------------------------|----------------|----------------|----------------------------|----------------|----------------|
|                       | <b>Mean</b>                | <b>LIC 95%</b> | <b>UIC 95%</b> | <b>Mean</b>                | <b>LIC 95%</b> | <b>UIC 95%</b> |
| <b>25-34 M</b>        | 1.0311                     | 1.0115         | 1.0506         | 3.3361                     | 3.2863         | 3.3859         |
| <b>25-34 F</b>        | 0.8655                     | 0.8507         | 0.8803         | 2.4910                     | 2.4572         | 2.5248         |
| <b>35-44 M</b>        | 1.0288                     | 1.0111         | 1.0465         | 3.3615                     | 3.3143         | 3.4088         |
| <b>35-44 F</b>        | 0.8453                     | 0.8329         | 0.8577         | 2.4062                     | 2.3762         | 2.4363         |
| <b>45-54 M</b>        | 1.0093                     | 0.9901         | 1.0285         | 3.2967                     | 3.2473         | 3.3461         |
| <b>45-54 F</b>        | 0.8590                     | 0.8458         | 0.8722         | 2.3527                     | 2.3208         | 2.3847         |
| <b>55-64 M</b>        | 1.0088                     | 0.9880         | 1.0297         | 3.1603                     | 3.1081         | 3.2126         |

|                |               |               |               |               |               |               |
|----------------|---------------|---------------|---------------|---------------|---------------|---------------|
| <b>55-64 F</b> | <b>0.8633</b> | <b>0.8487</b> | <b>0.8778</b> | <b>2.2744</b> | <b>2.2399</b> | <b>2.3090</b> |
| <b>65-74 M</b> | 0.9990        | 0.9713        | 1.0266        | 2.9446        | 2.8841        | 3.0051        |
| <b>65-74 F</b> | 0.8746        | 0.8553        | 0.8938        | 2.2519        | 2.2062        | 2.2976        |
| <b>75-84 M</b> | 1.0146        | 0.9780        | 1.0513        | 2.8646        | 2.7789        | 2.9504        |
| <b>75-84 F</b> | 0.9128        | 0.8856        | 0.9399        | 2.1946        | 2.1343        | 2.2549        |
| <b>85+ M</b>   | 1.0498        | 0.9767        | 1.1229        | 2.6120        | 2.4494        | 2.7746        |
| <b>85+ F</b>   | 0.9077        | 0.8663        | 0.9491        | 2.1788        | 2.0681        | 2.2895        |

Table 3: Salt inputs by age and gender in G3 and G4 - Baseline

| Age and gender | SALT in Group 3 (g) |         |         | SALT in Group 4 (g) |         |         |
|----------------|---------------------|---------|---------|---------------------|---------|---------|
|                | Mean                | LIC 95% | UIC 95% | Mean                | LIC 95% | UIC 95% |
| <b>25-34 M</b> | 1.9235              | 1.8630  | 1.9839  | 1.9053              | 1.8598  | 1.9508  |
| <b>25-34 F</b> | 1.6005              | 1.5598  | 1.6411  | 1.6060              | 1.5751  | 1.6370  |
| <b>35-44 M</b> | 1.8860              | 1.8301  | 1.9419  | 1.7422              | 1.7031  | 1.7814  |
| <b>35-44 F</b> | 1.6056              | 1.5664  | 1.6447  | 1.4728              | 1.4461  | 1.4994  |
| <b>45-54 M</b> | 1.8470              | 1.7941  | 1.8998  | 1.6246              | 1.5859  | 1.6634  |
| <b>45-54 F</b> | 1.5575              | 1.5180  | 1.5971  | 1.3710              | 1.3448  | 1.3971  |
| <b>55-64 M</b> | 1.8833              | 1.8166  | 1.9500  | 1.4694              | 1.4308  | 1.5080  |
| <b>55-64 F</b> | 1.5624              | 1.5185  | 1.6063  | 1.2543              | 1.2266  | 1.2821  |
| <b>65-74 M</b> | 1.7800              | 1.7005  | 1.8596  | 1.3515              | 1.3054  | 1.3977  |
| <b>65-74 F</b> | 1.5662              | 1.5036  | 1.6288  | 1.1837              | 1.1497  | 1.2177  |
| <b>75-84 M</b> | 1.7838              | 1.6671  | 1.9005  | 1.1887              | 1.1355  | 1.2420  |
| <b>75-84 F</b> | 1.5640              | 1.4848  | 1.6432  | 1.0799              | 1.0398  | 1.1199  |
| <b>85+ M</b>   | 1.6755              | 1.4761  | 1.8750  | 1.0976              | 1.0135  | 1.1818  |
| <b>85+ F</b>   | 1.4651              | 1.2884  | 1.6418  | 1.0411              | 0.9694  | 1.1127  |

Tables 4 and 5 show saturated fat from G1 and G2, G3 and G4, respectively, stratified by age group and gender. Tables 6 and 7 show added sugar and trans-fat from G1, G2, G3 and G4 stratified by age group and gender.

Table 4: Saturated fat inputs by age and gender in G1 and G2 - Baseline

| Age and gender | SAT FAT in Group 1<br>(% of energy) |         |         | SAT FAT in Group 2<br>(% of energy) |         |         |
|----------------|-------------------------------------|---------|---------|-------------------------------------|---------|---------|
|                | Mean                                | LIC 95% | UIC 95% | Mean                                | LIC 95% | UIC 95% |
| 25-34 M        | 8.5817                              | 8.4963  | 8.6671  | 11.6119                             | 11.4323 | 11.7916 |
| 25-34 F        | 8.8741                              | 8.7980  | 8.9503  | 11.5793                             | 11.4253 | 11.7333 |
| 35-44 M        | 8.6601                              | 8.5768  | 8.7434  | 11.6238                             | 11.4650 | 11.7826 |
| 35-44 F        | 8.9566                              | 8.8833  | 9.0298  | 11.6246                             | 11.4727 | 11.7765 |
| 45-54 M        | 8.6847                              | 8.5978  | 8.7716  | 11.7108                             | 11.5452 | 11.8764 |
| 45-54 F        | 8.9169                              | 8.8409  | 8.9930  | 11.5693                             | 11.4152 | 11.7235 |
| 55-64 M        | 8.6674                              | 8.5682  | 8.7666  | 11.5689                             | 11.3889 | 11.7489 |
| 55-64 F        | 8.9487                              | 8.8602  | 9.0373  | 11.5452                             | 11.3213 | 11.7691 |
| 65-74 M        | 8.9103                              | 8.7830  | 9.0375  | 11.3967                             | 11.1539 | 11.6395 |
| 65-74 F        | 9.1335                              | 9.0157  | 9.2513  | 11.2512                             | 11.0291 | 11.4733 |
| 75-84 M        | 9.3213                              | 9.1298  | 9.5128  | 11.0630                             | 10.7129 | 11.4132 |
| 75-84 F        | 9.5399                              | 9.3675  | 9.7123  | 11.0039                             | 10.6867 | 11.3210 |
| 85+M           | 9.5728                              | 9.2040  | 9.9417  | 10.8035                             | 10.1951 | 11.4119 |
| 85+F           | 9.9630                              | 9.6327  | 10.2933 | 10.4955                             | 9.8870  | 11.1041 |

Table 5: Saturated fat inputs by age and gender in G3 and G4 - Baseline

| Age and gender | SAT FAT in Group 3<br>% of energy |         |         | SAT FAT in Group 4<br>% of energy |         |         |
|----------------|-----------------------------------|---------|---------|-----------------------------------|---------|---------|
|                | Mean                              | LIC 95% | UIC 95% | Mean                              | LIC 95% | UIC 95% |
| 25-34 M        | 8.9446                            | 8.6498  | 9.2393  | 13.0415                           | 12.8679 | 13.2151 |
| 25-34 F        | 9.9938                            | 9.7276  | 10.2600 | 12.9047                           | 12.7674 | 13.0420 |
| 35-44 M        | 8.7407                            | 8.4556  | 9.0259  | 13.3310                           | 13.1569 | 13.5051 |
| 35-44 F        | 10.0874                           | 9.8252  | 10.3496 | 13.1218                           | 12.9859 | 13.2577 |
| 45-54 M        | 8.6579                            | 8.3626  | 8.9532  | 13.4529                           | 13.2701 | 13.6356 |
| 45-54 F        | 10.1690                           | 9.8960  | 10.4419 | 13.2124                           | 13.0695 | 13.3553 |
| 55-64 M        | 8.3832                            | 8.0556  | 8.7109  | 13.2968                           | 13.0852 | 13.5085 |
| 55-64 F        | 9.9033                            | 9.5999  | 10.2066 | 13.1620                           | 13.0040 | 13.3199 |
| 65-74 M        | 8.8964                            | 8.4563  | 9.3365  | 13.1975                           | 12.9480 | 13.4470 |
| 65-74 F        | 10.1008                           | 9.6830  | 10.5185 | 12.8949                           | 12.6864 | 13.1034 |
| 75-84 M        | 8.0728                            | 7.4542  | 8.6914  | 13.0157                           | 12.6426 | 13.3888 |
| 75-84 F        | 9.6739                            | 9.0985  | 10.2492 | 12.8083                           | 12.4985 | 13.1181 |
| 85+M           | 8.6161                            | 7.3687  | 9.8636  | 12.9831                           | 12.3311 | 13.6351 |
| 85+F           | 10.5627                           | 9.3750  | 11.7503 | 11.8000                           | 11.2489 | 12.3511 |

**Table 6: Added sugar inputs by age and gender in G1, G2, G3 and G4**

| Age/gender     | ADDED SUGAR in G1 |         |         | ADDED SUGAR in G2 |         |         | ADDED SUGAR in G3 |         |         | ADDED SUGAR in G4 |         |         |
|----------------|-------------------|---------|---------|-------------------|---------|---------|-------------------|---------|---------|-------------------|---------|---------|
|                | Mean              | LIC 95% | UIC 95% |
| <b>25-34 M</b> | 0.00              | 0.00    | 0.00    | 24.0676           | 22.9539 | 25.1813 | 0.3480            | 0.2650  | 0.4311  | 11.8343           | 11.5180 | 12.1506 |
| <b>25-34 F</b> | 0.00              | 0.00    | 0.00    | 26.6584           | 25.7266 | 27.5902 | 0.5149            | 0.4179  | 0.6118  | 12.2294           | 11.9565 | 12.5023 |
| <b>35-44 M</b> | 0.00              | 0.00    | 0.00    | 22.3557           | 21.4600 | 23.2513 | 0.4399            | 0.3404  | 0.5395  | 11.4936           | 11.1921 | 11.7951 |
| <b>35-44 F</b> | 0.00              | 0.00    | 0.00    | 25.2301           | 24.4137 | 26.0465 | 0.5572            | 0.4650  | 0.6494  | 12.0946           | 11.8190 | 12.3701 |
| <b>45-54 M</b> | 0.00              | 0.00    | 0.00    | 21.6645           | 20.7781 | 22.5509 | 0.4145            | 0.3300  | 0.4990  | 11.3630           | 11.0399 | 11.6861 |
| <b>45-54 F</b> | 0.00              | 0.00    | 0.00    | 25.2896           | 24.4306 | 26.1486 | 0.6205            | 0.5236  | 0.7174  | 12.0760           | 11.7815 | 12.3706 |
| <b>55-64 M</b> | 0.00              | 0.00    | 0.00    | 22.5492           | 21.4923 | 23.6061 | 0.6164            | 0.4980  | 0.7348  | 11.5710           | 11.1546 | 11.9874 |
| <b>55-64 F</b> | 0.00              | 0.00    | 0.00    | 25.0936           | 24.1473 | 26.0399 | 0.7657            | 0.6516  | 0.8798  | 12.0620           | 11.7241 | 12.3999 |
| <b>65-74 M</b> | 0.00              | 0.00    | 0.00    | 23.4027           | 22.1181 | 24.6873 | 0.7747            | 0.6046  | 0.9448  | 11.6290           | 11.1174 | 12.1405 |
| <b>65-74 F</b> | 0.00              | 0.00    | 0.00    | 26.4178           | 25.1408 | 27.6948 | 0.9676            | 0.8004  | 1.1348  | 11.9756           | 11.5224 | 12.4288 |
| <b>75+ M</b>   | 0.00              | 0.00    | 0.00    | 27.8567           | 25.4865 | 30.2269 | 1.0377            | 0.7467  | 1.3288  | 11.6443           | 10.9001 | 12.3884 |
| <b>75+ F</b>   | 0.00              | 0.00    | 0.00    | 29.1066           | 27.0597 | 31.1535 | 1.1700            | 0.9019  | 1.4381  | 12.4052           | 11.7195 | 13.0910 |
| <b>85+M</b>    | 0.00              | 0.00    | 0.00    | 31.1723           | 26.8092 | 35.5354 | 1.3044            | 0.6081  | 2.0008  | 11.4668           | 10.1503 | 12.7834 |
| <b>85+F</b>    | 0.00              | 0.00    | 0.00    | 36.0346           | 32.5345 | 39.5346 | 1.4001            | 0.8972  | 1.9031  | 13.6855           | 12.4764 | 14.8945 |



Table 7: Trans-fat inputs by age and gender in G1, G2, G3 and G4.

| Age/gender | TRANS-FAT in G1 |         |         | TRANS-FAT in G2 |         |         | TRANS-FAT in G3 |         |         | TRANS-FAT in G4 |         |         |
|------------|-----------------|---------|---------|-----------------|---------|---------|-----------------|---------|---------|-----------------|---------|---------|
|            | Mean            | LIC 95% | UIC 95% |
| 25-34 M    | 0.26            | 0.26    | 0.26    | 0.42            | 0.41    | 0.43    | 0.94            | 0.92    | 0.95    | 1.95            | 1.91    | 1.99    |
| 25-34 F    | 0.26            | 0.25    | 0.26    | 0.41            | 0.41    | 0.42    | 0.99            | 0.98    | 1.01    | 2.02            | 1.99    | 2.05    |
| 35-44 M    | 0.26            | 0.25    | 0.26    | 0.41            | 0.41    | 0.42    | 0.93            | 0.91    | 0.95    | 2.00            | 1.96    | 2.04    |
| 35-44 F    | 0.25            | 0.25    | 0.26    | 0.41            | 0.41    | 0.42    | 1.02            | 1.00    | 1.03    | 2.07            | 2.04    | 2.10    |
| 45-54 M    | 0.25            | 0.25    | 0.26    | 0.41            | 0.41    | 0.42    | 0.93            | 0.91    | 0.95    | 2.05            | 2.01    | 2.09    |
| 45-54 F    | 0.24            | 0.24    | 0.25    | 0.40            | 0.40    | 0.41    | 1.02            | 1.00    | 1.04    | 2.06            | 2.03    | 2.09    |
| 55-64 M    | 0.24            | 0.24    | 0.25    | 0.41            | 0.40    | 0.41    | 0.93            | 0.91    | 0.96    | 2.05            | 2.00    | 2.09    |
| 55-64 F    | 0.24            | 0.23    | 0.24    | 0.40            | 0.39    | 0.41    | 1.02            | 1.00    | 1.04    | 2.11            | 2.07    | 2.15    |
| 65-74 M    | 0.24            | 0.24    | 0.25    | 0.40            | 0.39    | 0.41    | 0.97            | 0.94    | 1.00    | 2.11            | 2.05    | 2.17    |
| 65-74 F    | 0.23            | 0.23    | 0.24    | 0.38            | 0.37    | 0.39    | 1.05            | 1.02    | 1.08    | 2.12            | 2.07    | 2.17    |
| 75+ M      | 0.24            | 0.23    | 0.25    | 0.39            | 0.37    | 0.40    | 0.96            | 0.93    | 1.00    | 2.14            | 2.06    | 2.22    |
| 75+ F      | 0.23            | 0.23    | 0.24    | 0.38            | 0.37    | 0.39    | 1.04            | 1.00    | 1.08    | 2.12            | 2.05    | 2.19    |
| 85+M       | 0.24            | 0.23    | 0.26    | 0.38            | 0.35    | 0.40    | 0.97            | 0.90    | 1.05    | 2.19            | 2.05    | 2.33    |
| 85+F       | 0.22            | 0.21    | 0.23    | 0.37            | 0.34    | 0.40    | 1.04            | 0.97    | 1.11    | 1.89            | 1.77    | 2.01    |

## 2b Expected mortality reduction

### *Baseline*

In 2018, **115,229** CHD deaths and **99,799** stroke deaths were reported in Brazil, according to Ministry of Health (Mortality Information System). By carrying out a negative binomial projection to 2048, approximately **371,993** CVD deaths will occur (Table 8).

The results for the scenarios are illustrated in Table 9. Predictions have been made assuming both *cumulative effect* and *non-cumulative effects*.

Tables 10, 11, 12, 13 and 14 show the predicted number of deaths prevented or postponed in **Scenarios 1, 2, 3, 4** and **5**, respectively, with stochastic outputs using *cumulative* and *non-cumulative* effects by gender and age group.

Table 8: Number of deaths by CHD and Stroke in 2018 and results for binomial projection in 2048

|              | 2018             |               |                  |               | 2048             |               |                  |               |
|--------------|------------------|---------------|------------------|---------------|------------------|---------------|------------------|---------------|
|              | Number of Deaths |               | Number of Deaths |               | Number of Deaths |               | Number of Deaths |               |
|              | CHD              |               | Stroke           |               | CHD              |               | Stroke           |               |
| AGES         | <u>Men</u>       | <u>Women</u>  | <u>Men</u>       | <u>Women</u>  | <u>Men</u>       | <u>Women</u>  | <u>Men</u>       | <u>Women</u>  |
| <b>25-34</b> | 2,785            | 1,369         | 723              | 640           | 1,346            | 449           | 348              | 261           |
| <b>35-44</b> | 2,606            | 1,145         | 1,374            | 1,342         | 2,263            | 679           | 918              | 755           |
| <b>45-54</b> | 7,627            | 3,241         | 3,858            | 3,211         | 9,110            | 2,710         | 3,393            | 2,359         |
| <b>55-64</b> | 14,749           | 7,170         | 9,420            | 6,993         | 22,132           | 7,455         | 10,207           | 6,145         |
| <b>65-74</b> | 17,556           | 11,065        | 12,728           | 9,612         | 35,651           | 16,028        | 18,514           | 11,971        |
| <b>75-84</b> | 14,368           | 12,823        | 13,937           | 14,022        | 37,609           | 24,495        | 26,059           | 22,767        |
| <b>85+</b>   | 7,678            | 11,047        | 8,618            | 13,321        | 26,165           | 29,796        | 21,499           | 30,908        |
| <b>Total</b> | <b>67,369</b>    | <b>47,860</b> | <b>50,658</b>    | <b>49,141</b> | <b>134,276</b>   | <b>81,613</b> | <b>80,938</b>    | <b>75,166</b> |

Table 9: Estimated CHD and Stroke deaths prevented or postponed by achievement of scenarios 1, 2, 3, 4 and 5 in specific food policy options by sex in Brazil.

|                                    | CHD                                 |                                       | STROKE                              |                                       |
|------------------------------------|-------------------------------------|---------------------------------------|-------------------------------------|---------------------------------------|
|                                    | Men<br>Deaths prevented<br>(95% CI) | Women<br>Deaths prevented<br>(95% CI) | Men<br>Deaths prevented<br>(95% CI) | Women<br>Deaths prevented<br>(95% CI) |
| <b>OPTIMISTIC SCENARIO</b>         |                                     |                                       |                                     |                                       |
| <b>With cumulative effects</b>     | 79,586<br>(64,474-94,225)           | 49,795<br>(40,015-60,649)             | 33,571<br>(28,627-38,798)           | 33,484<br>(27,858-39,186)             |
| <b>With non-cumulative effects</b> | 87,847<br>(69,807-105,701)          | 54,781<br>(43,356-67,274)             | 35,220<br>(29,799-40,867)           | 35,140<br>(29,019-41,441)             |
| <b>MINIMAL SCENARIO</b>            |                                     |                                       |                                     |                                       |
| <b>With cumulative effects</b>     | 16,749<br>(12,984-20,492)           | 9,494<br>(7,075-11,923)               | 6,141<br>(4,875-7,427)              | 5,230<br>(3,822-6,681)                |
| <b>With non-cumulative effects</b> | 17,739<br>(13,602-21,937)           | 10,013<br>(7,374-12,700)              | 6,312<br>(4,986-7,665)              | 5,369<br>(3,902-6,891)                |
| <b>MODEST SCENARIO</b>             |                                     |                                       |                                     |                                       |
| <b>With cumulative effects</b>     | 42,417<br>(31,793-52,732)           | 27,695<br>(19,839-36,050)             | 17,257<br>(13,556-21,155)           | 18,338<br>(13,812-23,107)             |
| <b>With non-cumulative effects</b> | 44,667<br>(33,171-55,990)           | 29,235<br>(20,789-38,252)             | 17,735<br>(13,863-21,828)           | 18,924<br>(14,173-23,949)             |
| <b>INTERMEDIARY SCENARIO</b>       |                                     |                                       |                                     |                                       |
| <b>With cumulative effects</b>     | 46,698<br>(37,241-55,832)           | 29,390<br>(23,211-35,638)             | 20,274<br>(16,488-24,291)           | 20,398<br>(15,914-25,066)             |
| <b>With non-cumulative effects</b> | 49,685<br>(39,119-60,016)           | 31,254<br>(24,333-38,356)             | 20,883<br>(16,914-25,115)           | 21,072<br>(16,356-25,999)             |
| <b>ADVANCED SCENARIO</b>           |                                     |                                       |                                     |                                       |
| <b>With cumulative effects</b>     | 59,336<br>(46,153-72,504)           | 37,091<br>(28,024-46,971)             | 23,477<br>(19,101-28,012)           | 23,514<br>(18,516-28,767)             |
| <b>With non-cumulative effects</b> | 62,622<br>(48,240-77,186)           | 39,146<br>(29,322-49,943)             | 24,133<br>(19,535-28,926)           | 24,237<br>(19,020-29,768)             |

Table 10: Stochastic Outputs for the Probabilistic Sensitive Analysis in relation to number of deaths reduction by CHD and Stroke in the Optimistic Scenario.

| AGES         | Cumulative effects |               |                  |               | Non-cumulative effects |               |                  |               |
|--------------|--------------------|---------------|------------------|---------------|------------------------|---------------|------------------|---------------|
|              | Number of Deaths   |               | Number of Deaths |               | Number of Deaths       |               | Number of Deaths |               |
|              | CHD                |               | Stroke           |               | CHD                    |               | Stroke           |               |
|              | Men                | Women         | Men              | Women         | Men                    | Women         | Men              | Women         |
| 25-34        | 1,231              | 384           | 169              | 123           | 1,440                  | 450           | 185              | 134           |
| 35-44        | 2,060              | 634           | 436              | 354           | 2,405                  | 738           | 478              | 387           |
| 45-54        | 6,549              | 2,008         | 1,365            | 955           | 7,418                  | 2,269         | 1,470            | 1,025         |
| 55-64        | 13,053             | 4,543         | 3,720            | 2,290         | 14,478                 | 5,031         | 3,947            | 2,421         |
| 65-74        | 18,993             | 8,838         | 6,706            | 4,545         | 20,773                 | 9,650         | 7,031            | 4,753         |
| 75-84        | 21,715             | 14,453        | 11,277           | 10,139        | 23,841                 | 15,860        | 11,818           | 10,596        |
| 85+          | 15,985             | 18,935        | 9,899            | 15,078        | 17,491                 | 20,784        | 10,291           | 15,823        |
| <b>Total</b> | <b>79,586</b>      | <b>49,795</b> | <b>33,571</b>    | <b>33,484</b> | <b>87,847</b>          | <b>54,781</b> | <b>35,220</b>    | <b>35,140</b> |

Table 11: Stochastic Outputs for the Probabilistic Sensitive Analysis in relation to number of deaths reduction by CHD and Stroke in the Minimal Scenario.

| AGES         | Cumulative effects |              |                  |              | Non-cumulative effects |               |                  |              |
|--------------|--------------------|--------------|------------------|--------------|------------------------|---------------|------------------|--------------|
|              | Number of Deaths   |              | Number of Deaths |              | Number of Deaths       |               | Number of Deaths |              |
|              | CHD                |              | Stroke           |              | CHD                    |               | Stroke           |              |
|              | Men                | Women        | Men              | Women        | Men                    | Women         | Men              | Women        |
| 25-34        | 282                | 93           | 35               | 26           | 310                    | 102           | 37               | 27           |
| 35-44        | 480                | 143          | 91               | 74           | 527                    | 157           | 95               | 78           |
| 45-54        | 1,498              | 441          | 278              | 191          | 1,613                  | 475           | 289              | 199          |
| 55-64        | 2,887              | 971          | 729              | 441          | 3,065                  | 1,031         | 753              | 455          |
| 65-74        | 4,004              | 1,777        | 1,259            | 819          | 4,217                  | 1,871         | 1,293            | 840          |
| 75-84        | 4,300              | 2,838        | 1,922            | 1,735        | 4,532                  | 2,993         | 1,972            | 1,780        |
| 85+          | 3,297              | 3,231        | 1,828            | 1,945        | 3,475                  | 3,384         | 1,873            | 1,990        |
| <b>Total</b> | <b>16,749</b>      | <b>9,494</b> | <b>6,141</b>     | <b>5,230</b> | <b>17,739</b>          | <b>10,013</b> | <b>6,312</b>     | <b>5,369</b> |

Table 12: Stochastic Outputs for the Probabilistic Sensitive Analysis in relation to number of deaths reduction by CHD and Stroke in the Modest Scenario.

| AGES            | Cumulative effects |               |                  |               | Non-cumulative effects |               |                  |               |
|-----------------|--------------------|---------------|------------------|---------------|------------------------|---------------|------------------|---------------|
|                 | Number of Deaths   |               | Number of Deaths |               | Number of Deaths       |               | Number of Deaths |               |
|                 | CHD                |               | Stroke           |               | CHD                    |               | Stroke           |               |
|                 | <u>Men</u>         | <u>Women</u>  | <u>Men</u>       | <u>Women</u>  | <u>Men</u>             | <u>Women</u>  | <u>Men</u>       | <u>Women</u>  |
| <b>Under 35</b> | 699                | 208           | 91               | 65            | 753                    | 224           | 96               | 69            |
| <b>35-44</b>    | 1,055              | 364           | 209              | 190           | 1,100                  | 391           | 216              | 199           |
| <b>45-54</b>    | 3,556              | 1,119         | 711              | 500           | 3,780                  | 1,189         | 741              | 520           |
| <b>55-64</b>    | 6,927              | 2,463         | 1,899            | 1,174         | 7,309                  | 2,596         | 1,966            | 1,213         |
| <b>65-74</b>    | 9,992              | 4,757         | 3,377            | 2,326         | 10,486                 | 4,990         | 3,476            | 2,390         |
| <b>75-84</b>    | 11,557             | 7,752         | 5,824            | 5,230         | 12,182                 | 8,165         | 5,998            | 5,374         |
| <b>85+</b>      | 8,632              | 11,032        | 5,147            | 8,853         | 9,058                  | 11,681        | 5,242            | 9,160         |
| <b>Total</b>    | <b>42,417</b>      | <b>27,695</b> | <b>17,257</b>    | <b>18,338</b> | <b>44,667</b>          | <b>29,235</b> | <b>17,735</b>    | <b>18,924</b> |

Table 13: Stochastic Outputs for the Probabilistic Sensitive Analysis in relation to number of deaths reduction by CHD and Stroke in the Intermediary Scenario.

| AGES            | Cumulative effects |               |                  |               | Non-cumulative effects |               |                  |               |
|-----------------|--------------------|---------------|------------------|---------------|------------------------|---------------|------------------|---------------|
|                 | Number of Deaths   |               | Number of Deaths |               | Number of Deaths       |               | Number of Deaths |               |
|                 | CHD                |               | Stroke           |               | CHD                    |               | Stroke           |               |
|                 | <u>Men</u>         | <u>Women</u>  | <u>Men</u>       | <u>Women</u>  | <u>Men</u>             | <u>Women</u>  | <u>Men</u>       | <u>Women</u>  |
| <b>Under 35</b> | 690                | 227           | 94               | 68            | 757                    | 249           | 100              | 72            |
| <b>35-44</b>    | 1,159              | 346           | 242              | 193           | 1,269                  | 379           | 257              | 204           |
| <b>45-54</b>    | 3,692              | 1,101         | 773              | 535           | 3,983                  | 1,187         | 811              | 560           |
| <b>55-64</b>    | 7,447              | 2,537         | 2,150            | 1,315         | 7,945                  | 2,706         | 2,234            | 1,363         |
| <b>65-74</b>    | 10,958             | 5,032         | 3,960            | 2,677         | 11,600                 | 5,325         | 4,083            | 2,756         |
| <b>75-84</b>    | 12,983             | 8,615         | 6,842            | 6,128         | 13,781                 | 9,139         | 7,054            | 6,305         |
| <b>85+</b>      | 9,769              | 11,532        | 6,213            | 9,480         | 10,322                 | 12,270        | 6,344            | 9,812         |
| <b>Total</b>    | <b>46,698</b>      | <b>29,390</b> | <b>20,274</b>    | <b>20,398</b> | <b>49,658</b>          | <b>31,254</b> | <b>20,883</b>    | <b>21,072</b> |

Table 14: Stochastic Outputs for the Probabilistic Sensitive Analysis in relation to number of deaths reduction by CHD and Stroke in the Advanced Scenario.

| AGES            | Cumulative effects |               |                  |               | Non-cumulative effects |               |                  |               |
|-----------------|--------------------|---------------|------------------|---------------|------------------------|---------------|------------------|---------------|
|                 | Number of Deaths   |               | Number of Deaths |               | Number of Deaths       |               | Number of Deaths |               |
|                 | CHD                |               | Stroke           |               | CHD                    |               | Stroke           |               |
|                 | <u>Men</u>         | <u>Women</u>  | <u>Men</u>       | <u>Women</u>  | <u>Men</u>             | <u>Women</u>  | <u>Men</u>       | <u>Women</u>  |
| <b>Under 35</b> | 980                | 301           | 125              | 91            | 1,062                  | 326           | 132              | 96            |
| <b>35-44</b>    | 1,638              | 507           | 324              | 263           | 1,772                  | 548           | 341              | 276           |
| <b>45-54</b>    | 5,053              | 1,561         | 988              | 692           | 5,392                  | 1,665         | 1,031            | 720           |
| <b>55-64</b>    | 9,812              | 3,433         | 2,625            | 1,615         | 10,372                 | 3,626         | 2,717            | 1668          |
| <b>65-74</b>    | 13,980             | 6,530         | 4,628            | 3,142         | 14,685                 | 6,856         | 4,760            | 3227          |
| <b>75-84</b>    | 15,907             | 10,548        | 7,781            | 6,943         | 16,768                 | 11,114        | 8,006            | 7131          |
| <b>85+</b>      | 11,965             | 14,211        | 7,005            | 10,767        | 12,571                 | 15,011        | 7,146            | 11118         |
| <b>Total</b>    | <b>59,336</b>      | <b>37,091</b> | <b>23,477</b>    | <b>23,514</b> | <b>62,622</b>          | <b>39,146</b> | <b>24,133</b>    | <b>24,237</b> |

## APPENDIX

Table A. Population and data sources used in the UPF IMPACT model

| Information                                                           | Source                                                                                                                                                                                           |
|-----------------------------------------------------------------------|--------------------------------------------------------------------------------------------------------------------------------------------------------------------------------------------------|
| <b>Population data</b>                                                |                                                                                                                                                                                                  |
| Population counts by age and sex 2018 and population projection 2048. | Brazilian Institute of Geography and Statistics – Demographic Census<br>( <a href="http://www.ibge.gov.br">http://www.ibge.gov.br</a> )                                                          |
| <b>Number of deaths by CHD and Stroke</b>                             |                                                                                                                                                                                                  |
| CHD and Stroke deaths stratified by age and sex                       | Mortality Information System (MIS). Ministry of Health. Brazil. ( <a href="http://www.datasus.gov.br">www.datasus.gov.br</a> )<br>Coronary heart disease (CHD) - (I20-I25)<br>Stroke - (I60-I69) |

Table B. Data sources for Nutrient profile indicators of the food groups

| Information                                                     | Source                                                                              |
|-----------------------------------------------------------------|-------------------------------------------------------------------------------------|
| Fatty Acids Saturates: grams per day and mean of % food energy. | IBGE. Brazilian Household Budget Survey (2017/2018). Food Consumption Analysis. (6) |
| Sodium/salt: grams per day.                                     | IBGE. Brazilian Household Budget Survey. (2017/2018)(6)                             |
| Trans Fatty Acids: grams per day and mean of % food energy.     | IBGE. Brazilian Household Budget Survey (2017/2018). Food Consumption Analysis. (6) |
| Added sugar: grams per day and mean of % food energy.           | IBGE. Brazilian Household Budget Survey (2017/2018). (6)                            |

Table C. Data sources for effects estimates

| Information                                                                                          | Source                                                                                                                                                                                             |
|------------------------------------------------------------------------------------------------------|----------------------------------------------------------------------------------------------------------------------------------------------------------------------------------------------------|
| Replacement of 5% energy of SAT FAT by PUFAs                                                         | Jakobsen <i>et al.</i> (2009). Major types of dietary fat and risk of coronary heart disease: a pooled analysis of 11 cohort studies. (11)                                                         |
| 5g change in daily salt intake                                                                       | Strazzulo <i>et al.</i> (2009). Salt intake, stroke, and cardiovascular disease: meta-analysis of prospective studies.(13)                                                                         |
| Replacing 1% of energy from trans-fat with unsaturated fats reduces CHD risk by 12 % (5.5% to 18.5%) | Mozaffarian & Clarke (2009). Quantitative effects on cardiovascular risk factors and coronary heart disease risk of replacing partially hydrogenated vegetable oils with other fats and oils. (14) |
| 38% risk reduction of CVD by consuming 8%/day of added sugar                                         | Yang <i>et al.</i> (2014). Added sugar intake and cardiovascular diseases mortality among us adults. (15)                                                                                          |



## References

1. Carlos A. Monteiro, Geoffrey Cannon, Renata Levy J-CM, Patricia Jaime, Ana Paula Martins, Daniela Canella, Maria Louzada DParra, Also with Camila Ricardo, Giovanna Calixto, Priscila Machado CM, Euridice Martinez, Larissa Baraldi, Josefa Garzillo ISattamini. NOVA. The star shines bright. *World Nutr J World Public Health Nutr Assoc.* 2016;7(1–2):28–38.
2. Monteiro CA, Cannon G, Levy RB, Moubarac J-C, Louzada ML, Rauber F, et al. Ultra-processed foods: what they are and how to identify them. *Public Health Nutr.* abril de 2019;22(5):936–41.
3. Monteiro CA, Cannon G, Moubarac J-C, Levy RB, Louzada MLC, Jaime PC. The UN Decade of Nutrition, the NOVA food classification and the trouble with ultra-processing. *Public Health Nutr.* janeiro de 2018;21(1):5–17.
4. Brazil. Ministry of Health. Guia alimentar para a população brasileira [Internet]. Brasília: Ministry of Health.; 2014. 156 p. Disponível em: [https://bvsms.saude.gov.br/bvs/publicacoes/guia\\_alimentar\\_populacao\\_brasileira\\_2ed.pdf](https://bvsms.saude.gov.br/bvs/publicacoes/guia_alimentar_populacao_brasileira_2ed.pdf)
5. IBGE IB de G e E-. Pesquisa de orçamentos familiares 2002-2003 : aquisição alimentar domiciliar per capita : Brasil e grandes regiões. IBGE, organizador. Rio de Janeiro; 2004. 251p p.
6. Brazilian Institute of Geography and Statistics. IBGE. Pesquisa de Orçamentos Familiares 2017-2018. Análise do Consumo Alimentar Pessoal no Brasil. IBGE; 2020.
7. IBGE IB de G e E-. Pesquisa de orçamentos familiares 2008-2009 : análise do consumo alimentar pessoal no Brasil. IBGE, organizador. Rio de Janeiro; 2011. p. 150p.
8. IBGE IB de G a e E-. Pesquisa de Orçamentos Familiares 2008-2009. Aquisição alimentar domiciliar per capita Brasil e Grandes Regiões. IBGE, organizador. Rio de Janeiro; 2010.
9. Louzada ML da C, Martins APB, Canella DS, Baraldi LG, Levy RB, Claro RM, et al. Ultra-processed foods and the nutritional dietary profile in Brazil. *Rev Saúde Pública* [Internet]. 2015 [citado 5 de março de 2021];49. Disponível em: [http://www.scielo.br/scielo.php?script=sci\\_abstract&pid=S0034-89102015000100227&lng=en&nrm=iso&tlng=en](http://www.scielo.br/scielo.php?script=sci_abstract&pid=S0034-89102015000100227&lng=en&nrm=iso&tlng=en)
10. Brazilian Institute of Geography and Statistics. IBGE. Pesquisa de orçamentos familiares 2017-2018: avaliação nutricional da disponibilidade domiciliar de alimentos no Brasil. Rio de Janeiro: IBGE; 2020. 61 p.
11. Jakobsen MU, O'Reilly EJ, Heitmann BL, Pereira MA, Bälter K, Fraser GE, et al. Major types of dietary fat and risk of coronary heart disease: a pooled analysis of 11 cohort studies. *Am J Clin Nutr.* 2009;89(5):1425–32.

12. He FJ, MacGregor GA. Reducing Population Salt Intake Worldwide: From Evidence to Implementation. *Prog Cardiovasc Dis*. 2010;52(5):363–82.
13. Strazzullo P, D’Elia L, Kandala N-B, Cappuccio FP. Salt intake, stroke, and cardiovascular disease: meta-analysis of prospective studies. *BMJ*. 2009;339.
14. Mozaffarian D, Clarke R. Quantitative effects on cardiovascular risk factors and coronary heart disease risk of replacing partially hydrogenated vegetable oils with other fats and oils. *Eur J Clin Nutr*. 2009;63(S2):S22–33.
15. Yang Q, Zhang Z, Gregg EW, Flanders W, Merritt R, Hu FB. Added sugar intake and cardiovascular diseases mortality among us adults. *JAMA Intern Med*. 2014;174(4):516–24.
